# Contributing Factors to Dietary Quality and Food Security in Low-Income Households with Children in the United States: A Scoping Review

Denise Mc Keown<sup>1</sup>, Lisa Graves<sup>1</sup>, Bethany McGowan<sup>2</sup>, Heather A. Eicher-Miller<sup>1</sup>

<sup>1</sup>Department of Nutrition Science, Purdue University, West Lafayette, IN, United States;

<sup>2</sup>Libraries and School of Information Studies, Purdue University, West Lafayette, IN, United States

**Key words: food insecurity, food security, low-income, dietary quality, dietary selection, dietary behavior, family meal planning, food purchasing**

## Abstract

### Background:

Low income and food insecure households are at risk of poor dietary quality and food insecurity. Especially in childhood, consuming a nutritionally adequate diet is an essential driver of health, growth, and development. Prior research has shown many household-level factors can present challenges to support the nutritional needs of the members of low income and food insecure households.

### Objective:

The aim of the scoping review is to identify the contributing factors to dietary quality and food security in U.S. households of school-aged children and synthesize the evidence.

### Methods:

The scoping review was conducted following the Preferred Reporting Items for Systematic Reviews and Meta-Analysis Protocols Extension for Scoping Reviews (PRISMA-ScR) using search terms addressing food insecurity, low-income and dietary behaviors in the database PubMed (NCBI). Screening by 3 independent reviewers at the title, abstract, and full study phases identified forty-three studies included in the review.

### Results:

The studies addressed six themes: parental behaviors, child/adolescent behaviors, food procurement behaviors, food preparation behaviors, and psychosocial factors. Most studies were cross-sectional (n = 40, 93%) and focused on parental behaviors (n = 24, 56%), followed by food procurement behaviors, and food preparation behaviors.

### Conclusion:

The findings can be used to inform the development of future nutritional education interventions aimed at improving the dietary quality and food security in households with children. The themes identified were interrelated and suggest that providing parents with education on the following topics: 1) the importance of modeling positive eating behaviors in the home, 2) approaches to support and encourage positive feeding practices with their children, and 3) practical strategies to overcome barriers to purchasing and preparing foods of high nutrient quality. For example, delivering educational sessions on meal selection and preparation and improving nutritional knowledge hold promise to improve dietary quality among food insecure and low-income households.

## **1 Introduction**

### **1.1 Food insecurity and poor dietary quality in low-income households**

About 10.5% of households, or 13.8 million households, within the U.S. experienced food insecurity at some time throughout 2020<sup>1</sup>. Food insecurity refers to a situation where households experience uncertainty regarding having sufficient food or the inability to obtain sufficient food to meet the needs of all family members due to insufficient money or resources<sup>1</sup>. The United States Department of Agriculture (USDA) classifies food insecurity into two categories, low food security and very low food security. Low food security refers to ‘reports of reduced quality, variety, or desirability of diet and little or no indication of reduced food intake’. Very low food security refers to ‘reports of multiple indications of disrupted eating patterns and reduced food intake’<sup>2</sup>. Several factors including income, employment, and ethnicity can influence food insecurity. Insufficient or no money to purchase adequate food is a risk factor for food insecurity<sup>3,4,5</sup>. In 2020, 35.3% of low-income households were food insecure<sup>2</sup>. Both low income and food insecure households are at risk of reduced dietary quality when compared with households with higher incomes<sup>4,6</sup>.

Dietary quality refers to the quality of an individual's overall food intake<sup>7</sup>. The U.S. as a population do not meet dietary recommendations for fruit, vegetables, and whole grains and exceed dietary recommendations for added sugars, sodium, refined grains, and saturated fat<sup>8,9</sup>. In the U.S., the Healthy Eating Index (HEI) can be used to rate dietary quality as compared with the recommendations of the Dietary Guidelines for Americans (DGA)<sup>10</sup>. With an ideal HEI score of 100 indicating full adherence to the DGA, the average HEI score for Americans is 59. Children between the ages of 6 and 17 years have an HEI score of 53, and adults between the ages of 18 and 64 years have an HEI score of 58<sup>11</sup>. In the HEI-2010 report, food insecure households scored lower than food secure households, with HEI scores for the food at home purchase basket of 44 and 49 respectively<sup>12</sup>. HEI scores may be lower in food insecure households due to irregular dietary patterns, such as skipping meals and eating less or more of certain components than intended or required for health<sup>13</sup>. Households experiencing food insecurity and households with low-income report increased intake of sugar sweetened beverages, red/processed meat, salty foods and full fat dairy products and lower intakes of fruit, vegetables and fiber which may contribute negatively to dietary quality<sup>10</sup>. Poor dietary quality among low-income and food insecure households is associated with increased prevalence of health conditions, including some cancers, type 2 diabetes mellitus, obesity and cardiovascular disease<sup>14,15,16</sup>. Furthermore, food insecurity has been associated with difficulty managing existing health conditions<sup>16</sup>.

Along with reduced dietary quality, food insecurity is also linked to increased risk of nutrition insecurity<sup>17,18</sup>. According to the U.S. Department of Agriculture (USDA), nutritional security refers to “a situation that exists when all people, at all times, have physical, social, and economic access to sufficient, safe, and nutritious food that meets their dietary needs and food preferences for an active and healthy life”<sup>17</sup>. Nutritional security addresses diet quality as well as food access, emphasizing the relationship between food insecurity and an increased risk of diet-related illnesses<sup>19</sup>. Poor nutrition is noted as a leading cause of illness in the U.S., accounting for more than 600,000 deaths per year, or more than 40,000 each month<sup>20</sup>. Greater access to healthy meals and improved assistance would help reduce nutrition insecurity in the U.S., with the goal of achieving optimal physical and mental health among the U.S. population<sup>18</sup>.

Specifically for children, consuming a nutritionally adequate diet is an important driver in health, growth, development, and wellbeing<sup>21</sup>. Childhood is a special time of physical, mental, and emotional development where specific amounts and types of nutrients are necessary at critical times for achieving full genetic potential. Dietary behaviors are established in childhood and continue into adulthood<sup>22</sup>. Food insecurity experienced during childhood can

be associated with the consumption of a nutritionally inadequate diet and poor health outcomes<sup>23</sup>. According to the HEI-2015, dietary quality was lower in food insecure children compared to food secure children<sup>24</sup>. Children who are food insecure are more likely to have poor overall health, twice as likely to have asthma, and are nearly three times more likely to have iron deficiency anaemia than food-secure children<sup>25</sup>. Children in households with low incomes also have poor dietary quality and increased prevalence of poor health conditions, including obesity, mental health problems, and asthma compared with children from households with higher incomes<sup>26</sup>. The highest prevalence of childhood obesity was among children from families with low incomes<sup>27</sup>. Studies investigating the nutritional quality of children's diet in relation to family income concluded that children from low-income households had lower intakes of dietary fiber, calcium, fruit, and whole grains along with higher levels of sodium, refined sugars, and saturated fat<sup>28,29,30</sup>.

### **1.2 Limited resources constrain dietary quality and impact relationships among low income and food insecure households**

Both low income and food insecure households can face challenges in obtaining food to support the nutritional needs of family members. Availability of food resources has been hypothesized as a major determining factor for purchasing a high-quality diet<sup>31</sup>. Along with economical restraints, dietary choices in family households can be influenced by multiple challenges including availability, accessibility, food preferences, eating behaviors, parental nutritional behaviors and knowledge, parental modeling and psychosocial precursors<sup>10,22</sup>.

Several studies have examined the association between income and dietary quality and food security highlighting income as the most significant challenge for food insecurity and dietary quality in households with low incomes<sup>10,31</sup>. The cost of healthy food is an economic driver of food insecurity and poor dietary quality. Regardless of individuals having the necessary knowledge and skills, a limited budget may result in individuals opting for food of best economical value instead of food with the most nutritional value. Studies examining food purchases and nutritional quality concluded that households with lower incomes purchased foods of lower nutritional quality when compared to households with higher incomes<sup>10,12,32</sup>.

Parental influence, including nutritional beliefs, attitudes, and knowledge play a role in the dietary quality of their children's diets as well as their children's health, nutritional knowledge, and eating behaviors<sup>33,34</sup>. Furthermore, it is important to understand the distribution of food between members of the family in order to assess the dietary quality of the entire household. In food insecure households with children, parents may protect their children from negative changes to dietary quality and quantity by using strategies such as limiting or altering their own dietary intake<sup>35</sup>. In 2020, 14.8% of households with children experienced food insecurity. However, in half of these households, only the parents experienced food insecurity<sup>1</sup>. Therefore, food insecurity and poor dietary quality may be more evident in adults than in children. Furthermore, food security may also differ by age of the child. Adolescents are twice as likely to experience food insecurity when compared with younger members of the family. This may be because adolescents are more independent from the household and adolescents may be able to access food outside of the home more easily<sup>37</sup>.

### **1.3 Rationale to investigate the factors influencing dietary quality and food security among low-income households**

Food expense, family relationships, and other recognized influences described above are known to impact dietary quality and food security in low-income households. Yet, interest in additional factors influencing dietary intake and food security has grown since the greater recognition of food security in the 2010 DGA and more recent recognition of nutrition security<sup>38,19</sup>. Furthermore, knowledge of both parents' and children's behaviors, food procurement and preparation behaviors, and psychosocial aspects spanning a wide range of studies and literature are important in gaining a broader understanding and synthesis of the

relevant scientific evidence. A scoping review can be used to comprehensively identify and integrate the factors influencing dietary quality and food security in low-income households as well as to identify any existing gaps in knowledge. Understanding families' priorities and challenges in the purchasing and consumption of nutritious foods is important for informing and implementing future nutritional interventions targeted at improving dietary quality in low income and food insecure households. A scoping review can be used to integrate prior knowledge to maximize the impact of future nutritional education interventions in households<sup>39</sup>.

This scoping review aims to determine the contributing factors to dietary quality and food security in low-income U.S. households with children. The purpose of this review is to synthesize the evidence on this topic and identify the factors affecting the dietary quality and food security of low-income households with children.

## **2 Methods**

### **2.1 Literature search strategy**

The PRISMA (Preferred Reporting Items for Systematic Reviews and Meta-Analysis Protocols) Extension for Scoping Reviews (PRISMA-ScR) was utilized to conduct the review<sup>40</sup>. Search strategies were developed collectively through discussion between four researchers. The following search term was used: (food insecurity OR food security OR low-income OR poverty) AND United States AND (dietary quality OR dietary behavior OR dietary selection OR dietary attitudes OR family meal planning OR food purchasing). The online database, PubMed (NCBI) was used to search for studies published within the last 10 years between 2012 and 2022.

The inclusion criteria were as follows: all studies written in English and published within the last 10 years (2012 -2022) which focused on food security and/or dietary quality of low-income families in the U.S., and the factors/behaviors/attitudes/barriers affecting food security and/or dietary quality in these households.

Excluded studies were those that did not match the conceptual framework of the study, not written in English, carried out outside of the U.S., not focused on low-income or food insecure households, those focused on households without children and those not focused on school aged children.

### **2.2 Study selection**

The PubMed (NCBI) search identified 2,127 studies. The search results were exported to EndNote and Rayyan software, which was used to remove duplicates. Three duplicates were removed. Studies were reviewed at 3 stages: title, abstract and full text. Each stage was reviewed by 2 independent reviewers. Firstly, titles and abstracts were screened based on eligibility criteria. Titles and abstracts were screened by two reviewers independently. Studies were either marked as 'included', 'excluded', or 'maybe' by the reviewers. An independent reviewer was a tiebreaker who reviewed the titles and abstracts of studies in instances when there was conflict on study inclusion or exclusion. Any studies that were judged as 'maybe' were treated as 'included'. Next, the remaining chosen studies were screened by reading the full text using the same process as the screening for previous stages, using the inclusion criteria. One hundred and seven studies were selected for full-text evaluation. Forty-three studies were included in the scoping review (Figure 1).

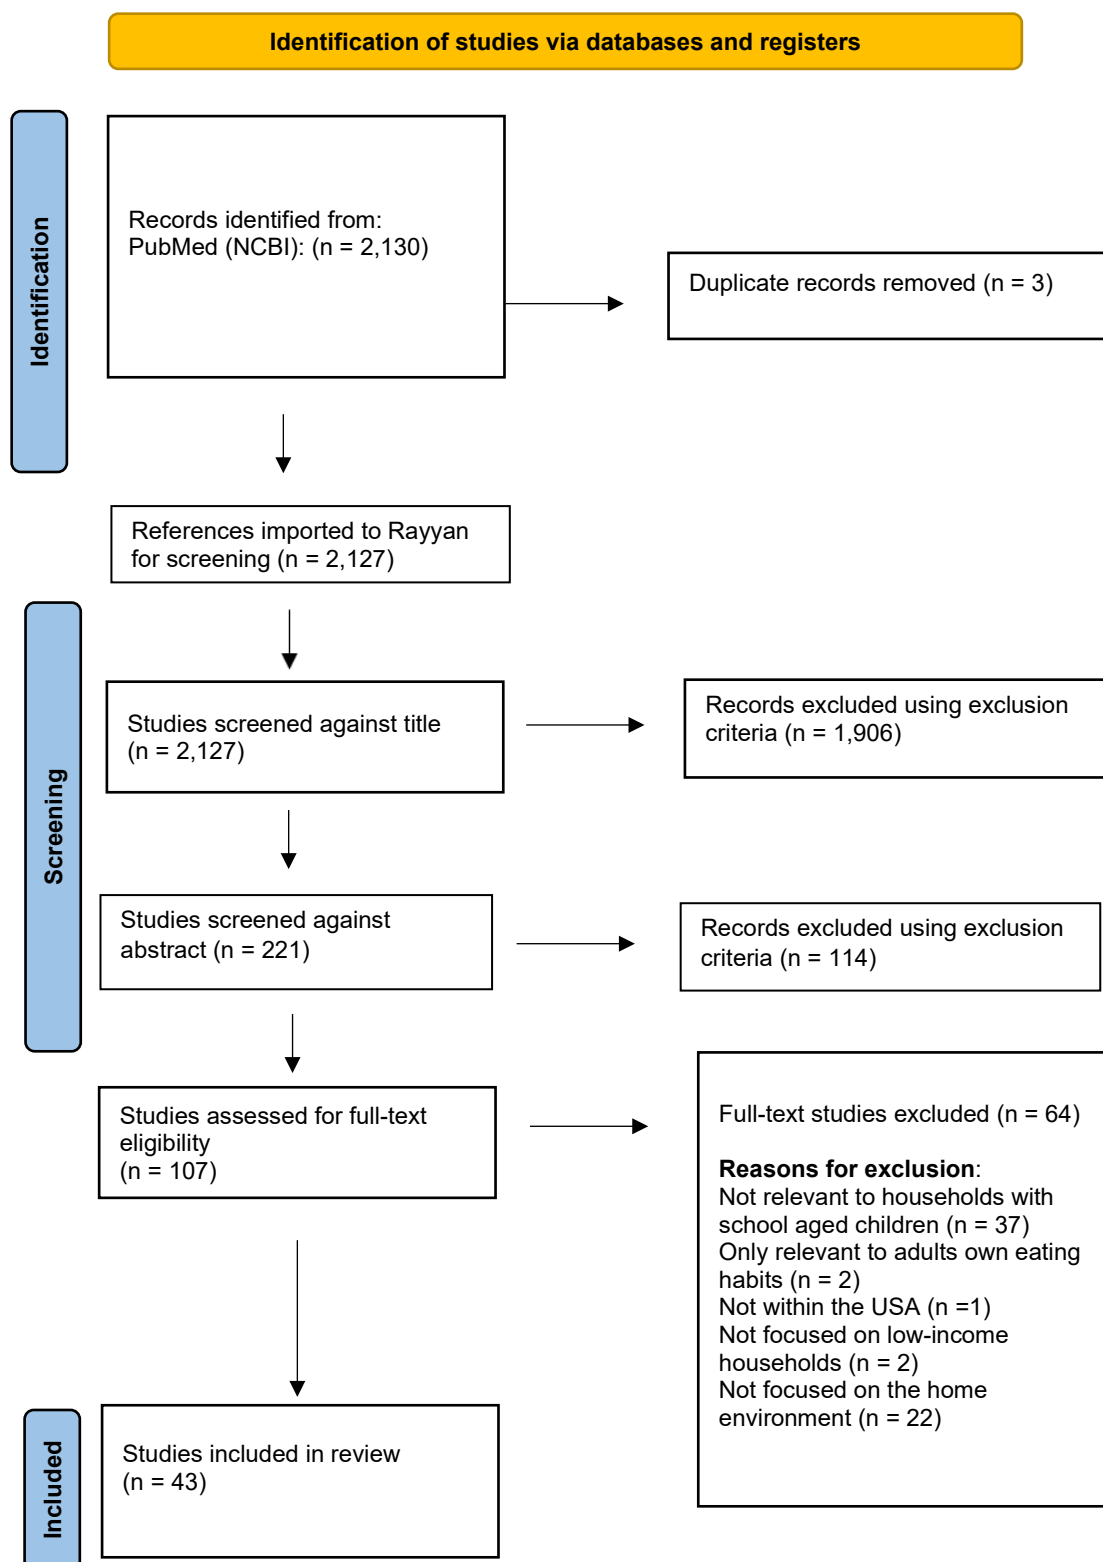

**Figure 1.** PRISMA flow diagram

### 2.3 Data synthesis

The studies' title, author, aims, study design, studied population, and main findings are presented in **Table 1**. Most of the 43 studies were cross-sectional ( $n = 40$ , 93%), followed by longitudinal ( $n = 1$ , 2%) and systematic reviews ( $n = 2$ , 5%). Contributing factors to dietary

quality and food insecurity in low-income households were organized into five themes: 1) parental behaviors, 2) adolescent/child behaviors, 3) food procurement behaviors, 4) food preparation behaviors, and 5) psychosocial factors. Several studies addressed more than one of the themes. Twenty-four studies (56%) included parental behaviors, 7 studies (16%) included adolescent/child behaviors, 13 studies (30%) included food procurement behaviors, 12 studies (28%) included food preparation behaviors, and 11 studies (26%) included psychosocial factors. **Table 2** identifies the themes discussed in each study.

### 3 Results

#### 3.1 Parental behaviors

Parental behaviors investigated included parental modeling, feeding practices, parental attitudes and support, and parenting styles. Parental modeling, in 11 of the studies<sup>41,42,43,44,45,46,47,48,49,50,51</sup>, refers to a parent's effort to demonstrate healthy food choices and healthy eating behaviors with the objective that the child will exhibit similar behaviors. Parental modeling was associated with shaping child's eating behaviors<sup>41</sup>. Four studies showed an association between parent modeling and increased fruit and vegetable intake among children while modeling of energy-dense food was associated with increased sugar sweetened beverage intake<sup>42,43,44,45,46</sup>. One study reported healthy eating modeling was associated with reduced child consumption of high-sugar/high-fat snacks<sup>45</sup>. In 5 studies, parental modeling acted as a support for encouraging healthy eating behaviors among children<sup>47,48,49,50,51</sup>.

Parental feeding practices linked to child behavior were investigated in several studies<sup>50,51,52,53,54,55</sup>. Parents reported engaging in different feeding practices to influence children, such as pressure to eat, food restriction, and controlling food intake, based on child characteristics, including weight, age, and developmental stage<sup>50</sup>. According to three studies, parents engage in behaviors to control the feeding environment in the home, such as food restriction feeding practices when the child is overweight and pressure-to-eat feeding practices when the child is a healthy weight<sup>50,51,52</sup>. According to two studies, income and food security are linked to food restriction and pressure-to-eat behaviors, with low-income and with low or very low food secure households being more likely to engage in these food restriction and pressure-to-eat practices<sup>53,54</sup>.

Parental eating attitudes and support from parents play a role in eating habits among children. Parents reported encouraging healthy eating behaviors through practices such as limiting the availability of sugar-sweetened foods in the home. On the other hand, the same study indicated that parents buy foods that they know their children will eat to avoid buying foods that will go to waste, which can contribute to the purchasing of foods with reduced dietary quality<sup>55</sup>. Parents reported monitoring their children's food intake, establishing their own healthy relationship with food, and encouraging their children to select nutritious options to assist them in making healthy food choices<sup>55,56</sup>. Parents also had rules in place for adolescent dietary intake, such as limiting particular foods in the home, and focusing on healthy foods<sup>57</sup>. One study examining breakfast frequency found that family meal frequency was associated with positive attitudes around meals and food<sup>58</sup>.

Parents can engage in strategies to control the home feeding environment with the aim to control their child's intake of foods, like adapting the type and amount of food served at meals<sup>59,60</sup>. In food insecure situations, parents reported adapting their own dietary intake with the aim of their children receiving sufficient amounts of food, by reducing the parent's own portion sizes and skipping meals<sup>56,59,60, 61,62</sup>. Parents from low-income households also expressed goals to restrict junk food in the home, encourage the child to eat a nutritious diet, and to promote fruit and vegetable intake<sup>56,63</sup>. However, one study also noted that not all parental feeding goals turn into practices in the home<sup>63</sup>.

Studies<sup>34,61</sup> on parenting styles and impact on dietary quality of children were identified. One reported that parents who adapted authoritarian parenting attitudes and behaviors were positively associated with dietary quality of the child. Authoritarian parenting attitudes and behaviors typically involve parents having high demands, low responsiveness, low emotional warmth, and unwillingness to negotiate. A permissive parenting style, having few rules and giving children freedom in choice, was negatively associated with child dietary quality<sup>61</sup>. Alternatively, the second study indicated an association between authoritative parenting style and reduced fruit and vegetable consumption among adolescents<sup>34</sup>. Parenting styles should be considered as a potential determinant that is associated with overall nutritional quality.

### **3.2 Adolescent/Child behavior**

Adolescent/Child behaviors in 9 studies<sup>41,43,46,52,57,59,65,66,67</sup>, included investigations of personal food preferences, healthy eating attitudes and behaviors, and picky eating. Adolescents reported choosing food based on preference, convenience, the foods available in the home or the food offered to them by someone else. Health was considered the least common reason for choice<sup>57</sup>. Adolescent preference was noted as a determinant in adolescent dietary intake in two other studies<sup>41,57</sup>. According to one study, adolescent fruit, vegetable, and fiber intake was positively associated with healthy eating intentions and self-efficacy<sup>65</sup>. Eating attitudes and behaviors were associated with dietary quality<sup>46</sup>.

Adolescents demonstrated basic nutritional knowledge and were able to recognize healthy and unhealthy foods. However, the adolescents held some misconceptions around healthy foods<sup>47</sup>. One study reported that youth self-efficacy, nutritional knowledge and healthy attitudes were important psychosocial factors that influence youth eating behaviors<sup>65</sup>. Another concluded that psychosocial factors, including knowledge and self-efficacy, did not differ between food secure and food insecure households<sup>67</sup>.

Adolescents also reported being motivated to adopt healthy dietary practices in their diets however some reported that it was difficult to sustain these healthy eating changes<sup>47</sup>. Picky eating among children was disruptive on family mealtime and the home environment, causing meal-related stress and increased time parents spend in meal preparation as picky eating can require parents to adjust or make additional meals<sup>52,66</sup>.

### **3.3 Food procurement behaviors**

Food procurement behaviors in 9 studies<sup>13,55,59,60,61,68,69,70,93</sup> comprised of topics including purchasing behaviors and strategies and barriers to purchasing foods. Priorities that individuals considered when purchasing foods included cost, family preferences, food preparation time, family needs, and shelf life. Studies reported behaviors engaged in when purchasing foods included making lists, buying sale items, comparing prices, shopping in discount stores, and using coupons<sup>13,55,59,60,61,68,69</sup>. Price was a major determinant in purchasing behaviors<sup>61</sup>. These barriers were more often reported in food insecure households compared to food secure households<sup>70</sup>. One study compared food procurement behaviors in food insecure and food secure households and reported food insecure households being significantly more likely to use cost saving practices, such as price comparisons. However, there was no difference between the groups in the use of anticipatory behaviors, including meal planning and making a shopping list<sup>13</sup>. Two studies reported that the high cost of fruit and vegetables was the main barrier in purchasing<sup>68,70</sup>. In contrast to these findings, one study found no relationship between purchasing barriers and the presence of fruit and vegetables at dinner meals<sup>93</sup>.

### **3.4 Food preparation behaviors**

Food preparation behaviors like incorporating meal planning, kitchen/cooking supplies, cooking skills, and food availability were addressed in 12 studies<sup>13,5,59,60,70,71,72,73,74,93,94</sup>. Availability of healthy foods was associated with dietary quality and food security in five of the studies<sup>45,70,71,93,94</sup>. One study reported an association between food security status and the availability of vegetables in the home<sup>70</sup>, while two studies reported an association between

availability of fruit and vegetables in the home and increased child consumption of fruit and vegetables<sup>93,94</sup>. Similarly, two studies also suggested that the healthfulness of foods available may be associated with child's dietary quality, with increased fruit and vegetable intake<sup>45,71</sup>. Consistently, results indicate a relationship between the availability of healthy foods in the home and improved dietary quality and food security.

The accessibility of food preparation supplies was investigated in two studies<sup>72,75</sup>. One study highlighted that availability of food preparation supplies in the home is associated positively with frequency of family meals. Fruit and vegetable consumption increased with frequency of family meals, while sugar sweetened beverage consumption decreased<sup>72</sup>. Contradictorily, a longitudinal observational study's results suggested that kitchen adequacy is not a barrier to healthy eating<sup>75</sup>.

Several studies investigated meal preparation and planning behaviors<sup>74,94,13,60,73,60</sup>. One study reported food insecure households were less likely to prepare a home-cooked meal compared to food secure households. Furthermore, findings show that low-income households, regardless of food security status, have a low prevalence of planning behaviors related to buying and preparing food<sup>13</sup>. Lack of sufficient time to prepare foods was identified as a barrier to making home cooked meals<sup>60</sup>. The most common food preparation methods required basic skills, little equipment and easily accessible ingredients<sup>73</sup>. Food insecure compared with food secure households were reported to be more likely to report barriers<sup>70</sup>.

### **3.5 Psychosocial factors**

Ten studies discussed the influence of psychosocial factors, self-efficacy, nutritional and health knowledge, emotional factors, and family relationships on dietary quality and/or food security<sup>13,47,56,60,76,77,78,79</sup>. Self-efficacy, which refers to a person's belief in their ability to engage in healthy eating behaviors, was associated with increased dietary quality and healthy eating behaviors in low-income families and adolescents<sup>47,60,76</sup>.

Nutritional knowledge<sup>13,47,77</sup> was also shown to influence dietary quality. Caregivers had a basic understanding of sodium sources but had difficulty identifying sodium in sources such as cheese and prepared soups. Caregivers had little knowledge of the effects of increased salt consumption on childhood health<sup>77</sup>. According to one study, food insecure adults were less likely than food secure adults to read food labels<sup>13</sup>. According to the findings, knowledge about healthy eating and foods is an important component to focus on in future interventions.

Finally, household chaos was identified as an influencing factor on dietary quality and food security, owing to its negative impact on family relationships and mealtime-related stress<sup>56,79</sup>. Family chaos was significantly associated with food insecurity in one of those studies<sup>79</sup>. A study looking at parenting goals for feeding referred to psychosocial-orientated goals that parents utilized, these included aiming to have family meals to enhance family relationships and helping their child feel secure in the home, which may assist in overcoming mealtime chaos<sup>56</sup>.

## **4 Discussion**

This scoping review identified multiple factors, some of which are interrelated, highlighting the complexity of the breadth of evidence assessing key factors to dietary quality and food security in low-income households with children within the U.S. While cost, availability, and family relationships have been identified as key contributing factors, other factors related to dietary behaviors and attitudes, purchasing behaviors, food preparation behaviors, and environmental influences were also notably identified as important to dietary quality in households with low income and households experiencing food insecurity.

Parental behaviors were discussed in multiple studies. Parental behaviors that had the most influence on the household's dietary quality and food security were parental modeling, parental support and encouragement, parental feeding practices, and parenting styles. Findings



highlight the significant influence parents have on the food their child is consuming, including how much and what types of food. Parental modeling of healthy eating was consistent among studies showing a positive impact on their child's dietary quality. Additionally, parental support and encouragement for healthy eating can improve children's attitudes towards healthy eating. Parental feeding practices, such as food restriction and pressure to eat, can result in a child's negative attitude towards food and meals. Overall, parental behaviors should be highlighted with regards to their role in dietary quality and influence on their child's dietary quality.

Food procurement and preparation factors were commonly noted in this review. Findings suggest that low income and food insecure households experience more barriers to purchasing and preparing foods, including access to food and cost, when compared with households of higher income and food secure households. Overcoming barriers to purchasing and preparing foods may assist in improving the availability of food within the household. The use of strategies in purchasing foods was also mentioned, for example comparing prices, buying sale items, shopping in budget stores, to assist parents in managing their budgets. Results have associated availability of healthy foods in the home with increased dietary quality, and increased consumption of fruit and vegetables, which is consistent with previous studies and reviews<sup>80,81</sup>. In support of this, another study associated the availability of less healthy foods in the home with increased child intake of high-sugar/high-fat snacks<sup>82</sup>, suggesting that increasing the availability of healthful and decreasing less healthful foods in the household may enhance the dietary quality of children.

Lack of nutritional knowledge, along with lack of food preparation and cooking skills, can act as barriers to healthy eating and reduce the dietary quality of foods/meals consumed in the home. Lack of these skills may contribute to the higher prevalence of food insecure groups eating away from home and reduced prevalence of food insecure groups eating home-cooked meals<sup>13</sup>. A previous study investigating the relationship between self-efficacy, with regards to food preparation and cooking, and food security among adolescents concluded that with increased self-efficacy was increased food security<sup>83</sup>. Furthermore, increased nutritional awareness was linked to decreased energy density of the diet and increased food diversity and adequacy in meeting national recommendations across socioeconomic status<sup>84</sup>. The interactions between psychosocial factors, nutritional knowledge and self-efficacy, and dietary quality and food preparation behaviors show the combined influence of personal factors on dietary quality in the home.

## **5 Implications**

Federal U.S. nutrition assistance programs, such as the Supplemental Nutrition Assistance Program (SNAP), provide participants with financial benefits to assist with purchasing of food and can play an important role in supporting households to improve dietary quality and food security. In 2021, approximately 42.5 million people, 13% of the population, participated in SNAP<sup>85</sup>. SNAP can assist with increasing accessibility, availability, and intake of healthy foods to improve nutrition security. SNAP has been shown to reduce food insecurity in households by up to 30%<sup>95</sup>. Although SNAP is beneficial, one study found that even SNAP participants indicated that the cost of food was a major barrier to purchasing nutritious foods, and that SNAP payments did not support a healthy diet<sup>61</sup>. Findings from another study reported that food-insecure SNAP participants require approximately \$10 to \$20 more per person each week to buy sufficient food to meet their needs<sup>86</sup>. Therefore, expansion of benefits may promote food security among households with children.

Individuals from low-income households who participate in SNAP are also eligible to participate in SNAP-Education (SNAP-Ed), which is an evidence-based nutrition education program focusing on nutrition, budgeting, and a healthy lifestyle<sup>87</sup>. SNAP-Ed can play a

significant role in improving dietary quality and food security<sup>88</sup>. In previous research, SNAP-Ed has been shown to improve participants' food security<sup>87,89,90,91</sup>. However, SNAP-Ed, has not demonstrated improvements in participants' dietary quality<sup>88</sup>. This review can help to shape future SNAP-Ed efforts to address nutritional quality. SNAP-Ed should continue to offer education to help participants optimize diet quality while maximizing the use of their food dollars. Along with these areas of focus, parental behavior and attitudes should be topics considered for future SNAP-Ed educational sessions in households with children. Given the relationship between parental behaviors and child dietary quality, educating parents on the importance of modeling healthy eating behaviors in the home and providing children with encouragement and support may support healthful eating. Promoting early exposure to a range of nutrient-dense foods, including fruits and vegetables, should be encouraged as it may improve diet quality in future life stages and promote positive attitudes towards eating throughout childhood and adolescence. Additionally, educating parents on the implications of negative feeding practices and parenting styles, such as pressure to eat and food restriction practices, on their child's dietary quality, should also inform the development of educational lessons. Practical strategies to focus on include improving cooking skills, enhancing meal selection and planning knowledge, and improving attitudes toward healthy eating.

Most studies contained multiple themes illustrating their interrelationship. For example, if a parent purchases less nutritious food and brings it home, they increase the availability of these foods to their children and, as a result, build their food preference for these types of food. To obtain the greatest outcomes in terms of enhancing dietary quality and food security, components must be evaluated together, and all must be focused on during interventions.

Focusing on households with school children is important because the prevalence of food insecurity is disproportional among certain groups<sup>96</sup>. Additionally, the prevalence of food insecurity can vary within a household, in 7.8% of households with children, only the adults were affected by food insecurity. Parents often protect their child against food security by adapting the parents own intake<sup>1</sup>. Furthermore, race/ethnic status also impacts food security. In 2020, non-Hispanic black (21.7%) and Hispanic groups (17.2%) had a higher prevalence of food insecurity compared with the general population (10.5%)<sup>97</sup>. Therefore, it is important to recognize that factors may vary between households of different ethnicities, and these households may engage in behaviors that could vary from the ones featured in this review.

## **6 Limitations**

Only one database was utilized in the search method for this review. Thus, relevant studies published in other databases may have been excluded. Furthermore, the search was refined to only include research published within the previous ten years, which may have resulted in the exclusion of high-quality, evidence-based studies.

While the goal of a scoping review is to be broad, exclusion criteria must be established. Research that did not focus on school-aged children were omitted. Therefore, studies that explored exclusively preschool-aged children or younger were removed. These studies may have offered additional relevant findings as some households with young children also include older children and may impact the overall dietary quality and food security in the household. Furthermore, environmental, community, and social variables that may have an influence on dietary quality and food security in families were not examined in this research.

Most studies included in this review were cross-sectional. This study design is not able to provide support for causal relationships. Longitudinal and potentially randomized experimental studies would be beneficial to provide stronger evidence.

## **7 Conclusion**

Low income and food insecure households experience a variety of factors which impact the dietary quality of the food in the home. However, this review has identified several gaps within the literature that future studies could address. These gaps include further investigation of the associations between the factors, parental behaviors, child/adolescent behaviors, and dietary outcomes of children in these households over time. Longitudinal studies would be beneficial to strengthen the findings. The findings of this review can be used to inform the design and implementation of future nutritional education interventions in families with children aimed at improving dietary quality in low-income and food-insecure groups. From the above evidence, multiple factors influence the dietary quality and food security of low-income households with children in the U.S. and are reciprocally interlinked, and therefore must be considered collectively.

## **8 Conflict of interest**

The authors declare that the research was conducted in the absence of any commercial or financial relationships that could be construed as a potential conflict of interest.

## **9 Funding**

This work was supported by US Department of Agriculture, National Institute of Food and Agriculture (USDA NIFA) (grant [2022-68015-36279](#)), and USDA NIFA Hatch project (grant [IND030489](#)). The funders had no role in the design of the study; in the collection, analyses, or interpretation of data; in the writing of the manuscript, or in the decision to publish the results.

## References

1. Key statistics & graphics [Internet]. Usda.gov. [cited 2022 May 10]. Available from: <https://www.ers.usda.gov/topics/food-nutrition-assistance/food-security-in-the-u-s/key-statistics-graphics/>
2. Food security and nutrition assistance [Internet]. Usda.gov. [cited 2022 May 10]. Available from: <https://www.ers.usda.gov/data-products/ag-and-food-statistics-charting-the-essentials/food-security-and-nutrition-assistance/>
3. Coleman-Jensen A, Gregory C, Singh A. Household food security in the United States in 2013. SSRN Electron J [Internet]. 2014; Available from: <http://dx.doi.org/10.2139/ssrn.2504067>
4. Sharkey JR, Johnson CM, Dean WR. Relationship of household food insecurity to health-related quality of life in a large sample of rural and urban women. Women Health [Internet]. 2011;51(5):442–60. Available from: <http://dx.doi.org/10.1080/03630242.2011.584367>
5. Nord M. Characteristics of low-income households with very low food security: An analysis of the USDA GPR food security indicator. SSRN Electron J [Internet]. 2007; Available from: <http://dx.doi.org/10.2139/ssrn.1084839>
6. Healthypeople.gov. [cited 2022 May 10]. Available from: <https://www.healthypeople.gov/2020/topics-objectives/topic/social-determinants-health/interventions-resources/food-insecurity>
7. Leech RM, Worsley A, Timperio A, McNaughton SA. Understanding meal patterns: definitions, methodology and impact on nutrient intake and diet quality. Nutr Res Rev [Internet]. 2015;28(1):1–21. Available from: <http://dx.doi.org/10.1017/S0954422414000262>
8. Usda.gov. [cited 2022 May 10]. Available from: <https://www.ers.usda.gov/webdocs/publications/87531/eib-188.pdf?utm>
9. Pechey R, Monsivais P. Socioeconomic inequalities in the healthiness of food choices: Exploring the contributions of food expenditures. Prev Med [Internet]. 2016;88:203–9. Available from: <http://dx.doi.org/10.1016/j.ypmed.2016.04.012>
10. French SA, Tangney CC, Crane MM, Wang Y, Appelhans BM. Nutrition quality of food purchases varies by household income: the SHoPPER study. BMC Public Health [Internet]. 2019;19(1):231. Available from: <http://dx.doi.org/10.1186/s12889-019-6546-2>
11. HEI scores for Americans [Internet]. Usda.gov. [cited 2022 May 10]. Available from: <https://www.fns.usda.gov/hei-scores-americans>
12. Food security and food purchase quality among low-income households: Findings from the National Household Food Acquisition and Purchase Survey (FoodAPS) [Internet]. Usda.gov. [cited 2022 May 10]. Available from: <https://www.ers.usda.gov/publications/pub-details/?pubid=93737>
13. Ranjit N, Macias S, Hoelscher D. Factors related to poor diet quality in food insecure populations. Transl Behav Med [Internet]. 2020;10(6):1297–305. Available from: <http://dx.doi.org/10.1093/tbm/ibaa028>

14. Liu Y, Eicher-Miller HA. Food insecurity and cardiovascular disease risk. *Curr Atheroscler Rep* [Internet]. 2021;23(6):24. Available from: <http://dx.doi.org/10.1007/s11883-021-00923-6>
15. Seligman HK, Laraia BA, Kushel MB. Food insecurity is associated with chronic disease among low-income NHANES participants. *J Nutr* [Internet]. 2010;140(2):304–10. Available from: <http://dx.doi.org/10.3945/jn.109.112573>
16. Leung CW, Kullgren JT, Malani PN, Singer DC, Kirch M, Solway E, et al. Food insecurity is associated with multiple chronic conditions and physical health status among older US adults. *Prev Med Rep* [Internet]. 2020;20(101211):101211. Available from: <http://dx.doi.org/10.1016/j.pmedr.2020.101211>
17. Nutritional security through sustainable agriculture [Internet]. Usda.gov. [cited 2022 May 10]. Available from: <https://www.usda.gov/media/blog/2016/05/27/nutritional-security-through-sustainable-agriculture>
18. Hwalla N, El Labban S, Bahn RA. Nutrition security is an integral component of food security. *Front Life Sci* [Internet]. 2016;9(3):167–72. Available from: <http://dx.doi.org/10.1080/21553769.2016.1209133>
19. Mozaffarian D, Fleischhacker S, Andrés JR. Prioritizing nutrition security in the US. *JAMA* [Internet]. 2021;325(16):1605–6. Available from: <http://dx.doi.org/10.1001/jama.2021.1915>
20. Leading causes of death [Internet]. Cdc.gov. 2022 [cited 2022 May 10]. Available from: <https://www.cdc.gov/nchs/fastats/leading-causes-of-death.htm>
21. Azétsop J, Joy TR. Access to nutritious food, socioeconomic individualism and public health ethics in the USA: a common good approach. *Philos Ethics Humanit Med* [Internet]. 2013;8(1):16. Available from: <http://dx.doi.org/10.1186/1747-5341-8-16>
22. Chen TA, Reitzel LR, Obasi EM, Dave JM. Did school meal programs and SNAP participation improve diet quality of US children from low-income households: Evidence from NHANES 2013-2014? *Nutrients* [Internet]. 2021;13(10):3574. Available from: <http://dx.doi.org/10.3390/nu13103574>
23. Landry MJ, van den Berg AE, Asigbee FM, Vandyousefi S, Ghaddar R, Davis JN. Child-report of food insecurity is associated with diet quality in children. *Nutrients* [Internet]. 2019;11(7):1574. Available from: <http://dx.doi.org/10.3390/nu11071574>
24. Thomson JL, Tussing-Humphreys LM, Goodman MH, Landry AS. Diet quality in a nationally representative sample of American children by sociodemographic characteristics. *Am J Clin Nutr* [Internet]. 2019;109(1):127–38. Available from: <http://dx.doi.org/10.1093/ajcn/nqy284>
25. Eicher-Miller HA, Mason AC, Weaver CM, McCabe GP, Boushey CJ. Food insecurity is associated with iron deficiency anemia in U.S. adolescents. *FASEB J* [Internet]. 2009;23(S1). Available from: [http://dx.doi.org/10.1096/fasebj.23.1\\_supplement.737.7](http://dx.doi.org/10.1096/fasebj.23.1_supplement.737.7)
26. Gupta RP-S, de Wit ML, McKeown D. The impact of poverty on the current and future health status of children. *Paediatr Child Health* [Internet]. 2007;12(8):667–72. Available from: <http://dx.doi.org/10.1093/pch/12.8.667>

27. Ogden CL, Lamb MM, Carroll MD, Flegal KM. Obesity and socioeconomic status in children and adolescents: United States, 2005-2008. NCHS Data Brief. 2010;(51):1-8.
28. Fadeyev K, Nagao-Sato S, Reicks M. Nutrient and food group intakes among U.s. children (2-5 years) differ by family income to poverty ratio, NHANES 2011-2018. Int J Environ Res Public Health [Internet]. 2021;18(22):11938. Available from: <http://dx.doi.org/10.3390/ijerph182211938>
29. Fox MK, Gearan E, Cannon J, Briefel R, Deming DM, Eldridge AL, et al. Usual food intakes of 2- and 3-year old U.S. children are not consistent with dietary guidelines. BMC Nutr [Internet]. 2016;2(1). Available from: <http://dx.doi.org/10.1186/s40795-016-0106-2>
30. Ogata BN, Hayes D. Position of the Academy of Nutrition and Dietetics: nutrition guidance for healthy children ages 2 to 11 years. J Acad Nutr Diet [Internet]. 2014;14(8):1257-76. Available from: <http://dx.doi.org/10.1016/j.jand.2014.06.001>
31. Laraia BA, Leak TM, Tester JM, Leung CW. Biobehavioral factors that shape nutrition in low-income populations: A narrative review. Am J Prev Med [Internet]. 2017;52(2S2):S118-26. Available from: <http://dx.doi.org/10.1016/j.amepre.2016.08.003>
32. Turrell G, Hewitt B, Patterson C, Oldenburg B, Gould T. Socioeconomic differences in food purchasing behaviour and suggested implications for diet-related health promotion. J Hum Nutr Diet [Internet]. 2002;15(5):355-64. Available from: <http://dx.doi.org/10.1046/j.1365-277x.2002.00384.x>
33. Romanos-Nanclares A, Zazpe I, Santiago S, Marín L, Rico-Campà A, Martín-Calvo N. Influence of parental healthy-eating attitudes and nutritional knowledge on nutritional adequacy and diet quality among preschoolers: The SENDO project. Nutrients [Internet]. 2018;10(12):1875. Available from: <http://dx.doi.org/10.3390/nu10121875>
34. Burke MP, Jones SJ, Frongillo EA, Blake CE, Fram MS. Parenting styles are associated with overall child dietary quality within low-income and food-insecure households. Public Health Nutr [Internet]. 2019;22(15):2835-43. Available from: <http://dx.doi.org/10.1017/S1368980019001332>
35. McIntyre L, Glanville NT, Raine KD, Dayle JB, Anderson B, Battaglia N. Do low-income lone mothers compromise their nutrition to feed their children? CMAJ. 2003;168(6):686-91.
36. Mahmood L, Flores-Barrantes P, Moreno LA, Manios Y, Gonzalez-Gil EM. The influence of parental dietary behaviors and practices on children's eating habits. Nutrients [Internet]. 2021;13(4):1138. Available from: <http://dx.doi.org/10.3390/nu13041138>
37. Whitsett D, Sherman MF, Kotchick BA. Household food insecurity in early adolescence and risk of subsequent behavior problems: Does a connection persist over time? J Pediatr Psychol [Internet]. 2019;44(4):478-89. Available from: <http://dx.doi.org/10.1093/jpepsy/jsy088>
38. Zenk SN, Tabak LA, Pérez-Stable EJ. Research opportunities to address nutrition insecurity and disparities. JAMA [Internet]. 2022; Available from: <http://dx.doi.org/10.1001/jama.2022.7159>

39. Ryan-Ibarra S, DeLisio A, Bang H, Adedokun O, Bhargava V, Franck K, et al. The US Supplemental Nutrition Assistance Program - Education improves nutrition-related behaviors. *J Nutr Sci* [Internet]. 2020;9(e44):e44. Available from: <http://dx.doi.org/10.1017/jns.2020.37>
40. Tricco AC, Lillie E, Zarin W, O'Brien KK, Colquhoun H, Levac D, et al. PRISMA extension for Scoping Reviews (PRISMA-ScR): Checklist and explanation. *Ann Intern Med* [Internet]. 2018;169(7):467–73. Available from: <http://dx.doi.org/10.7326/M18-0850>
41. Di Noia J, Byrd-Bredbenner C. Determinants of fruit and vegetable intake in low-income children and adolescents. *Nutr Rev* [Internet]. 2014;72(9):575–90. Available from: <http://dx.doi.org/10.1111/nure.12126>
42. Wirthlin R, Linde JA, Trofholz A, Tate A, Loth K, Berge JM. Associations between parent and child physical activity and eating behaviours in a diverse sample: an ecological momentary assessment study. *Public Health Nutr* [Internet]. 2020;23(15):2728–36. Available from: <http://dx.doi.org/10.1017/S136898002000052X>
43. Coto J, Pulgaron ER, Graziano PA, Bagner DM, Villa M, Malik JA, et al. Parents as role models: Associations between parent and young children's weight, dietary intake, and physical activity in a minority sample. *Matern Child Health J* [Internet]. 2019;23(7):943–50. Available from: <http://dx.doi.org/10.1007/s10995-018-02722-z>
44. Wroblewski MM, Parker EA, Hager E, Hurley KM, Oberlander S, Merry BC, et al. Friends and family: How African-American adolescents' perceptions of dietary beliefs and behaviors of others relate to diet quality. *J Acad Nutr Diet* [Internet]. 2018;118(12):2302–10. Available from: <http://dx.doi.org/10.1016/j.jand.2018.07.021>
45. McIver MB, Colby S, Hansen-Petrik M, Anderson Steeves ET. Caregiver feeding practices as predictors for child dietary intake in low-income, Appalachian communities. *Nutrients* [Internet]. 2021;13(8):2773. Available from: <http://dx.doi.org/10.3390/nu13082773>
46. Tasevska N, DeLia D, Lorts C, Yedidia M, Ohri-Vachaspati P. Determinants of sugar-sweetened beverage consumption among low-income children: Are there differences by race/ethnicity, age, and sex? *J Acad Nutr Diet* [Internet]. 2017;117(12):1900–20. Available from: <http://dx.doi.org/10.1016/j.jand.2017.03.013>
47. Beck AL, Iturralde E, Haya-Fisher J, Kim S, Keeton V, Fernandez A. Barriers and facilitators to healthy eating among low-income Latino adolescents. *Appetite* [Internet]. 2019;138:215–22. Available from: <http://dx.doi.org/10.1016/j.appet.2019.04.004>
48. Zhen-Duan J, Engebretsen B, Laroche HH. Diet and physical activity changes among low-income families: perspectives of mothers and their children. *Int J Qual Stud Health Well-being* [Internet]. 2019;14(1):1658700. Available from: <http://dx.doi.org/10.1080/17482631.2019.1658700>
49. Sano Y, Routh B, Lanigan J. Food parenting practices in rural poverty context. *Appetite* [Internet]. 2019;135:115–22. Available from: <http://dx.doi.org/10.1016/j.appet.2018.11.024>
50. Gunther C, Reicks M, Banna J, Suzuki A, Topham G, Richards R, et al. Food parenting practices that influence early adolescents' food choices during independent eating occasions. *J Nutr Educ Behav* [Internet]. 2019;51(8):993–1002. Available from: <http://dx.doi.org/10.1016/j.jneb.2019.05.597>

51. Trofholz AC, Schulte AK, Berge JM. A qualitative investigation of how mothers from low income households perceive their role during family meals. *Appetite* [Internet]. 2018;126:121–7. Available from: <http://dx.doi.org/10.1016/j.appet.2018.03.017>
52. Berge JM, Trofholz A, Schulte A, Conger K, Neumark-Sztainer D. A qualitative investigation of parents’ perspectives about feeding practices with siblings among racially/ethnically and socioeconomically diverse households. *J Nutr Educ Behav* [Internet]. 2016;48(7):496-504.e1. Available from: <http://dx.doi.org/10.1016/j.jneb.2016.05.002>
53. Loth KA, MacLehose RF, Fulkerson JA, Crow S, Neumark-Sztainer D. Eat this, not that! Parental demographic correlates of food-related parenting practices. *Appetite* [Internet]. 2013;60(1):140–7. Available from: <http://dx.doi.org/10.1016/j.appet.2012.09.019>
54. Bauer KW, MacLehose R, Loth KA, Fisher JO, Larson NI, Neumark-Sztainer D. Eating- and weight-related parenting of adolescents in the context of food insecurity. *J Acad Nutr Diet* [Internet]. 2015;115(9):1408–16. Available from: <http://dx.doi.org/10.1016/j.jand.2015.01.011>
55. Gray VB, Hardman AM, Byrd SH. Qualitative evaluation of drivers of eating decisions among SNAP participants in Mississippi. *J Nutr Educ Behav* [Internet]. 2020;52(8):775–87. Available from: <http://dx.doi.org/10.1016/j.jneb.2020.04.006>
56. Schuster RC, Szpak M, Klein E, Sklar K, Dickin KL. “I try, I do”: Child feeding practices of motivated, low-income parents reflect trade-offs between psychosocial- and nutrition-oriented goals. *Appetite* [Internet]. 2019;136:114–23. Available from: <http://dx.doi.org/10.1016/j.appet.2019.01.005>
57. Banna J, Richards R, Jones B, Anderson AK, Reicks M, Cluskey M, et al. Describing independent eating occasions among low-income adolescents. *Int J Environ Res Public Health* [Internet]. 2020;17(3):981. Available from: <http://dx.doi.org/10.3390/ijerph17030981>
58. Larson N, Wang Q, Berge JM, Shanafelt A, Nanney MS. Eating breakfast together as a family: mealtime experiences and associations with dietary intake among adolescents in rural Minnesota, USA. *Public Health Nutr* [Internet]. 2016;19(9):1565–74. Available from: <http://dx.doi.org/10.1017/S1368980016000379>
59. Burke MP, Martini LH, Blake CE, Younginer NA, Draper CL, Bell BA, et al. Stretching food and being creative: Caregiver responses to child food insecurity. *J Nutr Educ Behav* [Internet]. 2017;49(4):296-303.e1. Available from: <http://dx.doi.org/10.1016/j.jneb.2016.11.010>
60. Palmer SM, Knoblauch ST, Winham DM, Hiller MB, Shelley MC. Putting knowledge into practice: Low-income women talk about food choice decisions. *Int J Environ Res Public Health* [Internet]. 2020;17(14):5092. Available from: <http://dx.doi.org/10.3390/ijerph17145092>
61. Kinsey EW, Oberle M, Dupuis R, Cannuscio CC, Hillier A. Food and financial coping strategies during the monthly Supplemental Nutrition Assistance Program cycle. *SSM Popul Health* [Internet]. 2019;7(100393):100393. Available from: <http://dx.doi.org/10.1016/j.ssmph.2019.100393>
62. Taylor EA, Foster JS, Mobley AR. Examining factors related to the food insecurity-obesity paradox in low-income mothers and fathers. *Food Nutr Bull* [Internet]. 2021;42(2):309–16. Available from: <http://dx.doi.org/10.1177/03795721211011133>



63. Pesch MH, Miller AL, Appugliese DP, Kaciroti N, Rosenblum KL, Lumeng JC. Low-income mothers' feeding goals predict observed home mealtime and child feeding practices. *Child Care Health Dev* [Internet]. 2016;42(6):934–40. Available from: <http://dx.doi.org/10.1111/cch.12396>
64. Colón-Ramos U, Monge-Rojas R, Smith-Castro V, Wang J, Cheng YI, Perreira KM, et al. Family function and eating behaviours among Hispanic/Latino youth: results from the Hispanic Community Children's Health Study/Study of Latino Youth (SOL Youth). *Public Health Nutr* [Internet]. 2021;24(5):924–34. Available from: <http://dx.doi.org/10.1017/S1368980020001457>
65. Trude ACB, Kharmats AY, Hurley KM, Anderson Steeves E, Talegawkar SA, Gittelsohn J. Household, psychosocial, and individual-level factors associated with fruit, vegetable, and fiber intake among low-income urban African American youth. *BMC Public Health* [Internet]. 2016;16(1). Available from: <http://dx.doi.org/10.1186/s12889-016-3499-6>
66. Trofholz AC, Schulte AK, Berge JM. How parents describe picky eating and its impact on family meals: A qualitative analysis. *Appetite* [Internet]. 2017;110:36–43. Available from: <http://dx.doi.org/10.1016/j.appet.2016.11.027>
67. Vedovato GM, Surkan PJ, Jones-Smith J, Steeves EA, Han E, Trude ACB, et al. Food insecurity, overweight and obesity among low-income African-American families in Baltimore City: associations with food-related perceptions. *Public Health Nutr* [Internet]. 2016;19(8):1405–16. Available from: <http://dx.doi.org/10.1017/s1368980015002888>
68. Askelson NM, Meier C, Baquero B, Friberg J, Montgomery D, Hradek C. Understanding the process of prioritizing fruit and vegetable purchases in families with low incomes: “A peach may not fill you up as much as hamburger.” *Health Educ Behav* [Internet]. 2018;45(5):817–23. Available from: <http://dx.doi.org/10.1177/1090198117752790>
69. Daniel C. Is healthy eating too expensive?: How low-income parents evaluate the cost of food. *Soc Sci Med* [Internet]. 2020;248(112823):112823. Available from: <http://dx.doi.org/10.1016/j.socscimed.2020.112823>
70. Landry MJ, Burgermaster M, van den Berg AE, Asigbee FM, Vandyousefi S, Ghaddar R, et al. Barriers to preparing and cooking vegetables are associated with decreased home availability of vegetables in low-income households. *Nutrients* [Internet]. 2020;12(6):1823. Available from: <http://dx.doi.org/10.3390/nu12061823>
71. Trofholz AC, Tate AD, Draxten ML, Rowley SS, Schulte AK, Neumark-Sztainer D, et al. What's being served for dinner? An exploratory investigation of the associations between the healthfulness of family meals and child dietary intake. *J Acad Nutr Diet* [Internet]. 2017;117(1):102–9. Available from: <http://dx.doi.org/10.1016/j.jand.2016.08.006>
72. Appelhans BM, Waring ME, Schneider KL, Pagoto SL. Food preparation supplies predict children's family meal and home-prepared dinner consumption in low-income households. *Appetite* [Internet]. 2014;76:1–8. Available from: <http://dx.doi.org/10.1016/j.appet.2014.01.008>
73. Sattler M, Hopkins L, Anderson Steeves E, Cristello A, McCloskey M, Gittelsohn J, et al. Characteristics of youth food preparation in low-income, African American homes: Associations with Healthy Eating Index scores. *Ecol Food Nutr* [Internet]. 2015;54(4):380–96. Available from: <http://dx.doi.org/10.1080/03670244.2014.1001982>

74. Rosemond TN, Blake CE, Shapiro CJ, Burke MP, Bernal J, Adams EJ, et al. Disrupted relationships, chaos, and altered family meals in food-insecure households: Experiences of caregivers and children. *J Acad Nutr Diet* [Internet]. 2019;119(10):1644–52. Available from: <http://dx.doi.org/10.1016/j.jand.2019.05.005>
75. Fertig AR, Trofholz AC, Loth K, Tate AD, Miner M, Neumark-Sztainer D, et al. Kitchen adequacy and child diet quality in a racially/ethnically diverse sample. *Ecol Food Nutr* [Internet]. 2022;61(1):81–9. Available from: <http://dx.doi.org/10.1080/03670244.2021.1968848>
76. Henry JL, Trude ACB, Surkan PJ, Anderson Steeves E, Hopkins LC, Gittelsohn J. Psychosocial determinants of food acquisition and preparation in low-income, urban African American households. *Health Educ Behav* [Internet]. 2018;45(6):898–907. Available from: <http://dx.doi.org/10.1177/1090198118760686>
77. Hoelt KS, Guerra C, Gonzalez-Vargas MJ, Barker JC. Rural Latino caregivers' beliefs and behaviors around their children's salt consumption. *Appetite* [Internet]. 2015;87:1–9. Available from: <http://dx.doi.org/10.1016/j.appet.2014.11.031>
78. Cummer E, Loyola Amador C, Montez K, Skelton JA, Ramirez B, Best S, et al. What a city eats: Examining the dietary preferences of families living in communities at high risk for food insecurity. *J Clin Transl Sci* [Internet]. 2020;5(1):e55. Available from: <http://dx.doi.org/10.1017/cts.2020.549>
79. Fiese BH, Gundersen C, Koester B, Jones B. Family chaos and lack of mealtime planning is associated with food insecurity in low income households. *Econ Hum Biol* [Internet]. 2016;21:147–55. Available from: <http://dx.doi.org/10.1016/j.ehb.2016.01.004>
80. Blanchette L, Brug J. Determinants of fruit and vegetable consumption among 6-12-year-old children and effective interventions to increase consumption. *J Hum Nutr Diet* [Internet]. 2005;18(6):431–43. Available from: <http://dx.doi.org/10.1111/j.1365-277X.2005.00648.x>
81. Pearson N, Biddle SJH, Gorely T. Family correlates of fruit and vegetable consumption in children and adolescents: a systematic review. *Public Health Nutr* [Internet]. 2009;12(2):267–83. Available from: <http://dx.doi.org/10.1017/S1368980008002589>
82. Hendy HM, Williams KE, Camise TS, Eckman N, Hedemann A. The Parent Mealtime Action Scale (PMAS). Development and association with children's diet and weight. *Appetite* [Internet]. 2009;52(2):328–39. Available from: <http://dx.doi.org/10.1016/j.appet.2008.11.003>
83. Knol LL, Robb CA, McKinley EM, Wood M. Very low food security status is related to lower cooking self-efficacy and less frequent food preparation behaviors among college students. *J Nutr Educ Behav* [Internet]. 2019;51(3):357–63. Available from: <http://dx.doi.org/10.1016/j.jneb.2018.10.009>
84. Alkerwi A, Sauvageot N, Malan L, Shivappa N, Hébert JR. Association between nutritional awareness and diet quality: evidence from the observation of cardiovascular risk factors in Luxembourg (ORISCAV-LUX) study. *Nutrients* [Internet]. 2015;7(4):2823–38. Available from: <http://dx.doi.org/10.3390/nu7042823>
85. Cbpps.org. [cited 2022 May 10]. Available from: <https://www.cbpps.org/sites/default/files/atoms/files/3-13-12fa-chartbook.pdf>

86. Cbpp.org. [cited 2022 May 10]. Available from: <https://www.cbpp.org/sites/default/files/atoms/files/7-30-19fa.pdf>
87. Rivera RL, Maulding MK, Abbott AR, Craig BA, Eicher-Miller HA. SNAP-Ed (Supplemental Nutrition Assistance Program-education) increases long-term food security among Indiana households with children in a randomized controlled study. *J Nutr* [Internet]. 2016;146(11):2375–82. Available from: <http://dx.doi.org/10.3945/jn.116.231373>
88. Rivera RL, Maulding MK, Eicher-Miller HA. Effect of Supplemental Nutrition Assistance Program-Education (SNAP-Ed) on food security and dietary outcomes. *Nutr Rev* [Internet]. 2019;77(12):903–21. Available from: <http://dx.doi.org/10.1093/nutrit/nuz013>
89. Eicher-Miller HA, Mason AC, Abbott AR, McCabe GP, Boushey CJ. The effect of Food Stamp Nutrition Education on the food insecurity of low-income women participants. *J Nutr Educ Behav* [Internet]. 2009;41(3):161–8. Available from: <http://dx.doi.org/10.1016/j.jneb.2008.06.004>
90. Rivera RL, Dunne J, Maulding MK, Wang Q, Savaiano DA, Nickols-Richardson SM, et al. Exploring the association of urban or rural county status and environmental, nutrition- and lifestyle-related resources with the efficacy of SNAP-Ed (Supplemental Nutrition Assistance Program-Education) to improve food security. *Public Health Nutr* [Internet]. 2018;21(5):957–66. Available from: <http://dx.doi.org/10.1017/s1368980017003391>
91. Eicher-Miller HA, Rivera RL, Sun H, Zhang Y, Maulding MK, Abbott AR. Supplemental Nutrition Assistance Program-education improves food security independent of food assistance and program characteristics. *Nutrients* [Internet]. 2020;12(9):2636. Available from: <http://dx.doi.org/10.3390/nu12092636>
92. US Census Bureau. Income and poverty in the United States: 2020. 2022 [cited 2022 May 10]; Available from: <https://www.census.gov/library/publications/2021/demo/p60-273.html>
93. Trofholz AC, Tate AD, Draxten ML, Neumark-Sztainer D, Berge JM. Home food environment factors associated with the presence of fruit and vegetables at dinner: A direct observational study. *Appetite* [Internet]. 2016;96:526–32. Available from: <http://dx.doi.org/10.1016/j.appet.2015.10.019>
94. Moffat LF, Ritchie LD, Gosliner W, Plank KR, Au LE. Perceived produce availability and child fruit and vegetable intake: The healthy Communities Study. *Nutrients* [Internet]. 2021;13(11):3681. Available from: <http://dx.doi.org/10.3390/nu13113681>
95. Ratcliffe C, Mckernan S-M. Usda.gov. 2010 [cited 2022 May 11]. Available from: <https://www.ers.usda.gov/webdocs/publications/84336/ccr-60.pdf?v=7536.8>
96. Coleman-Jensen A, Rabbitt MP, Gregory CA, Singh A. Household Food Security in the United States in 2017. 2018.
97. Odoms-Young A, Bruce MA. Examining the impact of structural racism on food insecurity: Implications for addressing racial/ethnic disparities. *Fam Community Health* [Internet]. 2018;41(S2):S3–6. Available from: <http://dx.doi.org/10.1097/fch.0000000000000183>

98. Coleman-Jensen A, Rabbitt MP, Gregory CA, Singh A. Household food security in the United States in 2015 [Internet]. Usda.gov. 2016 [cited 2022 May 12]. Available from: <https://www.ers.usda.gov/webdocs/publications/79761/err-215.pdf?v=42636>

**Table 1.** Characteristics of sources of evidence and main findings

| Year | Title                                                                                                                                    | Authors                                                                                                       | Aim                                                                                                                                                                                         | Study Design                        | Population                                                                           | Outcomes/findings                                                                                                                                                                                                                                                                                                                                                                                                                                                                                                                                                                                                                  |
|------|------------------------------------------------------------------------------------------------------------------------------------------|---------------------------------------------------------------------------------------------------------------|---------------------------------------------------------------------------------------------------------------------------------------------------------------------------------------------|-------------------------------------|--------------------------------------------------------------------------------------|------------------------------------------------------------------------------------------------------------------------------------------------------------------------------------------------------------------------------------------------------------------------------------------------------------------------------------------------------------------------------------------------------------------------------------------------------------------------------------------------------------------------------------------------------------------------------------------------------------------------------------|
| 2020 | Association between parent and child physical activity and eating behaviours in diverse sample: an ecological momentary assessment study | Wirthlin, R.; Linde, J. A.; Trofholz, A.; Tate, A.; Loth, K.; Berge, J. M.                                    | Examine the association between parent modeling of physical activity and dietary intake and child dietary intake and physical activity.                                                     | Qualitative – cross-sectional       | (n = 150)<br>Families w/ children (aged 5-7)                                         | Results showed significant association between parent modeling of dietary intake and child dietary intake. Parent modeling of fruit and vegetable intake was associated with increased fruit and vegetable intake in children. Parent modeling of energy dense foods (chips, fries, candy, sugar sweetened beverages) was associated with increased intake of sugar sweetened beverages in children. There was no significant association between parent modeling of dietary intake and child overall HEI-2010 score.                                                                                                              |
| 2019 | Barriers and facilitators to healthy eating among low-income Latino adolescents                                                          | Beck, A. L.; Iturralde, E.; Haya-Fisher, J.; Kim, S.; Keeton, V.; Fernandez, A                                | Explore barriers and facilitators to healthy eating among low-income Latino adolescents                                                                                                     | Qualitative, cross-sectional        | (n = 30)<br>Low-income adolescents (aged 13-17)                                      | Adolescents portrayed basic nutritional knowledge however had significant misconceptions about healthy eating. Adolescents reported emotional factors can be a challenge to healthy eating, some reported stress and negative emotions can lead to unhealthy eating. Adolescents reported parents showed support with healthy eating through purchasing healthy foods, providing home cooked meals, role modeling. However, most participants described family meals as calorie dense, consisting of protein and starch and no vegetables. They also reported frequent purchasing of high calorie low nutrient food and beverages. |
| 2020 | Barriers to Preparing and Cooking Vegetables Are Associated with Decreased Home Availability of Vegetables in Low-Income Households      | Landry, M. J.; Burgermaster, M.; van den Berg, A. E.; Asigbee, F. M.; Vandyousefi, S.; Ghaddar, R.; Jeans, M. | Examine the association of barriers to buying and preparing cooking vegetables with the home availability of vegetables and how this relationship differs according to food-security status | Qualitative - Cross-sectional study | (n = 1942)<br>Parent-child dyads (3 <sup>rd</sup> to 5 <sup>th</sup> grade students) | Findings show significant association between food security status & availability of vegetables in the home, food insecure households had a 15% lower availability of vegetables in the home than food secure households. Food insecure were reported as more likely to report barriers to buying/cooking/preparing vegetables. Reported barriers included cost, practical food knowledge and skills.                                                                                                                                                                                                                              |

R.; Yau,  
A.; Davis, J.  
N.;

|      |                                                                                                           |                                                                                         |                                                                                                                                                                                                                                     |                               |                                                             |                                                                                                                                                                                                                                                                                                                                                                                                                                                                                                                                                                                                                                                                                                                                                                                                                                                           |
|------|-----------------------------------------------------------------------------------------------------------|-----------------------------------------------------------------------------------------|-------------------------------------------------------------------------------------------------------------------------------------------------------------------------------------------------------------------------------------|-------------------------------|-------------------------------------------------------------|-----------------------------------------------------------------------------------------------------------------------------------------------------------------------------------------------------------------------------------------------------------------------------------------------------------------------------------------------------------------------------------------------------------------------------------------------------------------------------------------------------------------------------------------------------------------------------------------------------------------------------------------------------------------------------------------------------------------------------------------------------------------------------------------------------------------------------------------------------------|
| 2021 | Caregiver Feeding Practices as Predictors for Child Dietary Intake in Low-Income, Appalachian Communities | Mikaela B. McIver, Sarah Colby, Melissa Hansen-Petrik and Elizabeth T. Anderson Steeves | Describe the use of modeling, caregiver dietary intake, and home food availability and to describe their association with child fruit consumption, child veg consumption and child HS/HF snack food consumption                     | Qualitative - Cross-sectional | (n = 174) caregiver-child dyads (aged 2-10yrs)              | Greater use of caregiver modeling positively predicted child consumption of vegetables and negatively predicted child intake of high-sugar/high-fat snacks. Higher caregiver dietary intake of fruit and vegetables was a significant predictor of child fruit and vegetable intake. Higher home availability of healthier foods was associated with child fruit and vegetable consumption. Availability of less health foods in the home positively predicted child's intake of high sugar/high fat snacks                                                                                                                                                                                                                                                                                                                                               |
| 2020 | Describing Independent Eating Occasions (iEOs) among Low-Income Adolescents                               | J. Banna, R. Richards, B. Jones, A. K. Anderson, M. Reicks, M. Cluskey, et al.          | To describe iEOs among low-income early adolescents including the environmental context, foods selected, reasons for choosing these foods and parental rules identified by early adolescents related to foods consumed during iEOs. | Qualitative - Cross sectional | (n = 46) adolescents (10-13yrs)                             | The top four most frequently consumed foods at independent eating occasions (iEOs) were within the food categories of sweets, total fruit, dairy, and whole fruit. Reasons reported for choosing these foods included preference, it was the only option, convenience, availability and food was given by someone else. Health was reported as the least common reason for choosing foods. 58.8% of the adolescents reported that parents had rules about foods consumed during iEOs. Among those who reported rules at iEOs, 56.7% reported that parents did not want them to eat too much, 46.7% reported rules of avoiding/limiting certain kinds of foods, such as sweets; 13.3% of youth reported rules related to not making a mess, focusing on health with foods consumed or how food was eaten (e.g., not too fast), and saving food for others. |
| 2014 | Determinants of fruit and vegetable intake in low-income children and adolescents                         | Di Noia, J.; Byrd-Bredbenner, C.                                                        | Identify determinants of fruit and vegetable intake in low-income children and adolescents and to identify which determinants are associated with intake.                                                                           | Systematic review             | Articles including Low-income children and adolescents aged | Three determinants of fruit and vegetable were consistently related to intake were race/ethnicity, fruit and vegetable preference and maternal fruit and vegetable intake.                                                                                                                                                                                                                                                                                                                                                                                                                                                                                                                                                                                                                                                                                |

|      |                                                                                                                                                          |                                                                                                                                   |                                                                                                                                                        |                                |                                                                                                            |                                                                                                                                                                                                                                                                                                                                                                                                                                                                                                                |
|------|----------------------------------------------------------------------------------------------------------------------------------------------------------|-----------------------------------------------------------------------------------------------------------------------------------|--------------------------------------------------------------------------------------------------------------------------------------------------------|--------------------------------|------------------------------------------------------------------------------------------------------------|----------------------------------------------------------------------------------------------------------------------------------------------------------------------------------------------------------------------------------------------------------------------------------------------------------------------------------------------------------------------------------------------------------------------------------------------------------------------------------------------------------------|
|      |                                                                                                                                                          |                                                                                                                                   |                                                                                                                                                        |                                | between 10 and 19 years                                                                                    |                                                                                                                                                                                                                                                                                                                                                                                                                                                                                                                |
| 2019 | Diet and physical activity changes among low-income families: perspectives of mothers and their children                                                 | Zhen-Duan, J.; Engebretsen, B.; Laroche, H. H                                                                                     | Explore how adults and their children influence each other's diet and physical activity                                                                | Qualitative – cross-sectional  | (n = 18)<br>Adults who were glucose intolerant, diabetic or obese and lived with a minor (aged 10 -17yrs). | Two approaches to behaviour change were identified from the study, collaborative and non-collaborative approaches. A collaborative approach involved accepting change, encouraging each other, abstaining from buying and eating certain foods, leading by example, mutual expectations and compromise. Non-collaborative approach involved an individualistic approach and poor communication. Barriers identified included resource constraints and lack of information regarding healthy diets and recipes. |
| 2017 | What's Being Served for Dinner? An Exploratory Investigation of the Associations between the Healthfulness of Family Meals and Child Dietary Intake      | Trofholz, A. C.; Tate, A. D.; Draxten, M. L.; Rowley, S. S.; Schulte, A. K.; Neumark-Sztainer, D.; MacLehose, R. F.; Berge, J. M. | Investigate the specific foods available at family meals, the overall healthfulness of the meals, and their association with children's dietary intake | Quantitative - Cross sectional | (n = 120)<br>Families with children (6-12yr olds)                                                          | Findings suggest the healthfulness of foods served at family dinner meals may be associated with the overall dietary quality of children.                                                                                                                                                                                                                                                                                                                                                                      |
| 2018 | Understanding the Process of Prioritizing Fruit and Vegetable Purchases in Families with Low Incomes: "A Peach May Not Fill You Up as Much as Hamburger" | Askelson, N. M.; Meier, C.; Baquero, B.; Friberg, J.; Montgomery, D.; Hradek, C.                                                  | Understand the strategies and priorities of families with low income related to purchasing fruit and vegetables                                        | Qualitative – cross-sectional  | (n = 127)<br>parents of children in 3 <sup>rd</sup> grade                                                  | Parents reported 3 common themes considered when purchasing fruit and vegetables <ul style="list-style-type: none"> <li>• Shopping Strategies were a common strategy reported by participants which involved making lists, basing meals on sale items, shopping list based on coupons, buying cheap and in season foods and basing shops around pay checks</li> <li>• Prioritizing food purchases based on budget was another strategy used which involved buying what's</li> </ul>                            |

on sale, what is need and foods that will bulk out meals and last longer, most likely to be eaten, lack of preparation, cost, and health. Parents identified specific types of foods that were priorities in their shopping.

- Paying for fruit and vegetables was one of the themes. High cost was the most commonly mentioned barrier to fruit and vegetable purchasing. Participants indicated that fruit and vegetable are not a high priority when food budgets are tight as of perceived low satiety level.

|      |                                                                                                                                                               |                                                                                                                       |                                                                                                                                |                               |                                                           |                                                                                                                                                                                                                                                                                                                                                                                                                                                                                                                                                                                                                                                                                                                                                                                                                                                                                                                                                                                  |
|------|---------------------------------------------------------------------------------------------------------------------------------------------------------------|-----------------------------------------------------------------------------------------------------------------------|--------------------------------------------------------------------------------------------------------------------------------|-------------------------------|-----------------------------------------------------------|----------------------------------------------------------------------------------------------------------------------------------------------------------------------------------------------------------------------------------------------------------------------------------------------------------------------------------------------------------------------------------------------------------------------------------------------------------------------------------------------------------------------------------------------------------------------------------------------------------------------------------------------------------------------------------------------------------------------------------------------------------------------------------------------------------------------------------------------------------------------------------------------------------------------------------------------------------------------------------|
| 2017 | Stretching Food and Being Creative: Caregiver Responses to Child Food Insecurity                                                                              | Burke, M. P.; Martini, L. H.; Blake, C. E.; Youngine r, N. A.; Draper, C. L.; Bell, B. A.; Liese, A. D.; Jones, S. J. | Examine the strategies and behaviors caregivers use to manage household food supply when children experiencing food insecurity | Qualitative - Cross sectional | (n = 746) caregivers of children (<18 years old)          | <p>Caregivers reported behaviors that exhibit to adjust household food supply, these included making changes in foods purchased or obtained for household meals, which involves prioritizing some foods (hot dogs, chicken, rice), using foods that can be used to bulk meals out (stew, pasta, soups). Second most used strategy was monetary and shopping strategies, involving buying food according to price, shopping at budget stores. Other strategies used were making changes in household meal pattern (e.g., smaller portions, cut adult portions, adult doesn't eat at all, and adapting home preparations which refers to using leftovers and freezing meals).</p> <p>Behaviors to decrease/increase specific foods in children's diet included reducing protein foods (meat, chicken, beef), followed by reducing veg, grains &amp; starches (bread and rice) and increase grains &amp; starches (bread, rice), protein foods (hot dogs, beans), mixed dishes.</p> |
| 2016 | A Qualitative Investigation of Parents' Perspectives About Feeding Practices with Siblings Among Racially/Ethnically and Socioeconomically Diverse Households | Berge, J. M.; Trofholz, A.; Schulte, A.; Conger, K.; Neumark-Sztainer, D                                              | To describe parent feeding practices with siblings                                                                             | Qualitative - cross sectional | (n = 88) parents with at least 2 children (6-12 yrs. old) | <p>Parents reported utilizing feeding practices with their children. Majority reported that decisions on how to feed siblings impacted the foods prepared for meals. Sibling food preference, planned meal and in the moment decisions were the most common influencers to food choices.</p>                                                                                                                                                                                                                                                                                                                                                                                                                                                                                                                                                                                                                                                                                     |



Parents report engaging in different feeding practices based on child weight status. Food restriction was reported to be used if the child was overweight and pressure to eat feeding practices was used when one child was a healthy weight.

|             |                                                                                                               |                                                                              |                                                                                                                                                                                     |                                              |                                                        |                                                                                                                                                                                                                                                                                                                                                                                                                                        |
|-------------|---------------------------------------------------------------------------------------------------------------|------------------------------------------------------------------------------|-------------------------------------------------------------------------------------------------------------------------------------------------------------------------------------|----------------------------------------------|--------------------------------------------------------|----------------------------------------------------------------------------------------------------------------------------------------------------------------------------------------------------------------------------------------------------------------------------------------------------------------------------------------------------------------------------------------------------------------------------------------|
| <b>2018</b> | A qualitative investigation of how mothers from low-income households perceive their role during family meals | Trofholz, A. C., Schulte, A. K., Berge, J. M.                                | Investigate mother's role during family mealtimes                                                                                                                                   | Qualitative – cross sectional                | (n = 83) mothers of children (aged 6 -12 years)        | Mothers described their roles in family meals as helping children make healthy choices at family meals, making the meal happen, monitoring children's food intake, managing behaviors at the family meals, making the family meal atmosphere enjoyable and facilitating conversation.                                                                                                                                                  |
| <b>2020</b> | Qualitative Evaluation of Drivers of Eating Decisions among SNAP Participants in Mississippi                  | Gray, V. B.; Hardman, A. M.; Byrd, S. H.                                     | Explore food related patterns among SNAP recipients to explore food related decision patterns, barriers to healthy eating, perceptions of healthy eating, healthy eating strategies | Qualitative – cross sectional                | (n = 126) female caregivers of children (<13 yrs./old) | Major drivers of food selection and preparation were cost, convenience, eating habits, family food preferences. Strategies used by participants included couponing, using sale ads, buying in bulk, freezing, shopping at dollar stores, price matching. Participants reported they used food parenting practices in the home. These practices included encouraging healthy eating and changing habits in relation to purchasing food. |
| <b>2020</b> | Putting Knowledge into Practice: Low-Income Women Talk about Food Choice Decisions                            | Palmer, S. M.; Knoblauch, S. T.; Winham, D. M.; Hiller, M. B.; Shelley, M. C | Explore low-income women's perceived influence on their food choices                                                                                                                | Quantitative & Qualitative – cross-sectional | (n = 36) women (19-50yrs/old)                          | Findings reported the main barriers to healthy eating were convenience, cost, family food preferences. Facilitators to healthy eating included self-efficacy for nutrition change and nutritional and health knowledge.                                                                                                                                                                                                                |
| <b>2021</b> | Perceived Produce Availability and Child Fruit and Vegetable Intake: The Healthy Communities Study            | Moffat, L. F.; Ritchie, L. D.; Gosliner, W.; Plank, K. R.; Au, L. E.         | Determine the association of parent's perception of produce availability in their neighborhood, F&V availability, child F&V intake and child BMI.                                   | Qualitative – cross-sectional                | (n = 5138) children (aged 4-15 years)                  | Findings found an association between neighborhood produce availability and household fruit and vegetable availability, however the association did not vary by food security status. An association between household fruit and vegetable availability and child fruit and vegetable intake varied by food insecurity status.                                                                                                         |

|      |                                                                                                                                                                  |                                                                                                                                                          |                                                                                                                                                                                                  |                                |                                             |                                                                                                                                                                                                                                                                                                                                                                      |
|------|------------------------------------------------------------------------------------------------------------------------------------------------------------------|----------------------------------------------------------------------------------------------------------------------------------------------------------|--------------------------------------------------------------------------------------------------------------------------------------------------------------------------------------------------|--------------------------------|---------------------------------------------|----------------------------------------------------------------------------------------------------------------------------------------------------------------------------------------------------------------------------------------------------------------------------------------------------------------------------------------------------------------------|
| 2019 | Parents as Role Models: Associations Between Parent and Young Children's Weight, Dietary Intake, and Physical Activity in a Minority Sample                      | Coto, J.; Pulgaron, E. R.; Graziano, P. A.; Bagner, D. M.; Villa, M.; Malik, J. A.; Delamater, A. M                                                      | Examine the relationship between child and parent BMI, fruit and vegetable consumption, and physical activity levels in a sample of families primarily from minority and low-income backgrounds. | Qualitative - Cross-sectional  | (n = 86) parent-child dyad (aged 5-7 years) | A significant association was found between the healthy parent role model index score and child-reported fruit and vegetable intake, indicating that parents who were healthier role models had children with higher fruit and vegetable intake.                                                                                                                     |
| 2021 | Family function and eating behaviours among Hispanic/Latino youth: results from the Hispanic Community Children's Health Study/Study of Latino Youth (SOL Youth) | Colón-Ramos, U.; Monge-Rojas, R.; Smith-Castro, V.; Wang, J.; Cheng, Y. I.; Perreira, K. M.; Van Horn, L.; Sotres-Alvarez, D.; Isasi, C. R.; Gallo, L. C | Investigate family function, home environment and eating behaviors among youth.                                                                                                                  | Quantitative – cross-sectional | (n = 1466) youth (8 – 16 years)             | Family support was associated with increased youth fruit and vegetable consumption. According to participants, higher youth acculturative stress and increasing youth age was associated with reduced family function and closeness. Authoritarian parenting style was associated with reduced youth fruit and vegetable consumption.                                |
| 2019 | Disrupted Relationships, Chaos, and Altered Family Meals in Food-Insecure Households: Experiences of Caregivers and Children                                     | Rosemond, T. N.; Blake, C. E.; Shapiro, C. J.; Burke, M. P.; Bernal, J.; Adams, E.                                                                       | Investigate the relationships between food insecurity, household chaos, and family meals in the circumstances of food-insecure household                                                         | Qualitative – cross-sectional  | (n = 20) caregiver-child dyads (9-15yrs)    | Results suggested that foods served in the home depended on the availability of food. Some parents reported availability varies throughout the month. During food shortages, parents reported planning meals to allocate scarce food and using convenience foods. Household chaos influenced the frequency and location of meals and strained mealtime interactions. |

J.; Frongillo,  
E. A.

|      |                                                                                                                                            |                                                                                             |                                                                                                                                                                                                                                                              |                                              |                                                  |                                                                                                                                                                                                                                                                                                                                                                                                                                                                                                                                                                                                                                                                                   |
|------|--------------------------------------------------------------------------------------------------------------------------------------------|---------------------------------------------------------------------------------------------|--------------------------------------------------------------------------------------------------------------------------------------------------------------------------------------------------------------------------------------------------------------|----------------------------------------------|--------------------------------------------------|-----------------------------------------------------------------------------------------------------------------------------------------------------------------------------------------------------------------------------------------------------------------------------------------------------------------------------------------------------------------------------------------------------------------------------------------------------------------------------------------------------------------------------------------------------------------------------------------------------------------------------------------------------------------------------------|
| 2016 | Eating breakfast together as a family: mealtime experiences and associations with dietary intake among adolescents in rural Minnesota, USA | Larson, N.; Wang, Q.; Berge, J. M.; Shanafelt, A.; Nanney, M. S                             | Investigate the prevalence and experience of having family meals at breakfast and to examine the association between meal frequency and adolescent diet quality.                                                                                             | Quantitative – cross sectional               | (n = 827) adolescent girls (grade 9-10)          | Family dinner frequency was directly associated with family breakfast frequency. Family breakfast frequency was associated with adolescent involvement in the preparation of breakfast meals and with positive attitudes about mealtime. No association found between family breakfast frequency and diet quality.                                                                                                                                                                                                                                                                                                                                                                |
| 2015 | Eating- and weight-related parenting of adolescents in the context of food insecurity                                                      | Bauer, K. W.; MacLehose, R.; Loth, K. A.; Fisher, J. O.; Larson, N. I.; Neumark-Sztainer, D | Examine differences the eating and weight related parenting practices that mothers use with adolescent children in both food insecure and food secure households.                                                                                            | Quantitative - cross sectional               | (n =2,087) Mother-adolescent dyads (12-17 years) | Mothers from households experiencing low or very low food security were reported to be more likely to report that they engage in parental control of their child's diet, including encouraging children to eat, frequently commenting on child's weight, restricting eating and pressurising children to eat.                                                                                                                                                                                                                                                                                                                                                                     |
| 2019 | Food parenting practices in rural poverty context                                                                                          | Sano, Y.; Routh, B.; Lanigan, J.                                                            | Understand the influences on food parenting behaviors from a parent's perspective<br>1) how do mothers describe shaping their children's food experiences?<br>2) how do the mothers negotiate their food parenting practice in the context of rural poverty? | Qualitative & Quantitative – Cross-sectional | (n = 55) women with child (<13 years)            | Results report the use of coercive control strategies among parents in relation to food choices for children. These control strategies included parents deciding what and how much food and using food rewards to obtain control over their food and behaviour. Structure strategies were reported by parents which involved choosing available foods, offering limited choice, and modeling desired behaviors. Autonomy support was a method of parenting used in some families which involved children in food decisions. Food selection and food parenting were informed by their knowledge and intention to promote their child's healthy eating, their assessment of weight. |
| 2019 | Food Parenting Practices That Influence Early Adolescents' Food Choices During Independent Eating Occasions                                | Gunther, C.; Reicks, M.; Banna,                                                             | Investigate both parent and child perspectives on parenting practices that                                                                                                                                                                                   | Qualitative – cross sectional                | (n = 49) parent-child dyads (aged 10 -13 years)  | Common ways to influence independent eating occasions (iEOs) reported included setting rules, expectations and managing availability and accessibility.                                                                                                                                                                                                                                                                                                                                                                                                                                                                                                                           |

|      |                                                                                                                                        |                                                                                                          |                                                                                                                                                                                                                                                                                           |                                              |                                                                    |                                                                                                                                                                                                                                                                                                                                                                                                                                                                                                                                                                 |
|------|----------------------------------------------------------------------------------------------------------------------------------------|----------------------------------------------------------------------------------------------------------|-------------------------------------------------------------------------------------------------------------------------------------------------------------------------------------------------------------------------------------------------------------------------------------------|----------------------------------------------|--------------------------------------------------------------------|-----------------------------------------------------------------------------------------------------------------------------------------------------------------------------------------------------------------------------------------------------------------------------------------------------------------------------------------------------------------------------------------------------------------------------------------------------------------------------------------------------------------------------------------------------------------|
|      |                                                                                                                                        | J.; Suzuki, et al                                                                                        | influence food choices during IEO                                                                                                                                                                                                                                                         |                                              |                                                                    | Other ways to influence included teaching, pressure to eat, monitoring and modeling.                                                                                                                                                                                                                                                                                                                                                                                                                                                                            |
| 2015 | Characteristics of Youth Food Preparation in Low-Income, African American Homes: Associations with Healthy Eating Index Scores         | Sattler, M.; Hopkins, L.; Anderson Steeves, E.; Cristello, A.; McCloskey, M.; Gittelsohn, J.; Hurley, K. | Gain insight into food preparation among the youth, including how often they are preparing their own food, what techniques are being used, what associations are there between age, gender, and food preparation and what is the association between youth food prep and dietary quality. | Qualitative – cross sectional                | (n= 289) child-adult dyads (child aged 10-14)                      | Main food prepared in the home required basic skill, few ingredients, little equipment, easily found ingredients/foods in urban food environment. The most common method of preparation was raw preparation, microwaving and frying. No association was found between frequency of youth food preparation and total HEI score, HEI sodium, empty calories, or dairy scores. Older age was associated with lower HEI score. A significant association was found with HEI scores among females compared with males.                                               |
| 2017 | Determinants of Sugar-Sweetened Beverage Consumption among Low-Income Children: Are There Differences by Race/Ethnicity, Age, and Sex? | Tasevska, N.; DeLia, D.; Lorts, C.; Yedidia, M.; Ohri-Vachaspati, P.                                     | Identify child and parent lifestyle and household demographic factors predictive of high sugar sweetened beverages (SSB) consumption frequency in children from low-income, ethnically diverse communities that may help inform public health interventions                               | Qualitative – cross sectional                | (n = 1,403) parents of children (3-18 years)                       | Factors that are associated with large and statistically significant shifts to lower sugar sweetened beverages consumption included living in a non-English speaking household, low parental SSB consumption, having a parent with college education or higher, and having moderate consumption of breakfast of 6-7 days a week compared with never-2 days a week. 6-11 yr./olds who were moderate/high consumers of breakfast were 15-20% points less likely to be in the highest SSB consumption category, and 3-6% points more likely to never consume SSBs. |
| 2021 | Examining Factors Related to the Food Insecurity-Obesity Paradox in Low-Income Mothers and Fathers                                     | Taylor, E. A.; Foster, J. S.; Mobley, A. R.                                                              | Examine the factors that may be related to the food insecurity-obesity paradox                                                                                                                                                                                                            | Qualitative & Quantitative - cross-sectional | (n = 25) mother and father pairs with their child (2.5 - 10 years) | Results report that parents sacrificing their own diet quality to feed children was a common strategy used in the households. Mothers were significantly more likely to restrict their own food to ensure their children had enough to eat compared to fathers. Strategies parents used to ensure children obtaining enough food included letting children eat their meal first and splitting the remainder, prioritizing where money is spent or eating something else if there is not enough of the meal.                                                     |

|             |                                                                                                         |                                                                      |                                                                                                                                                                                                     |                                              |                                                                    |                                                                                                                                                                                                                                                                                                                                                                                                                                                                                                                                                                                                                                                                                               |
|-------------|---------------------------------------------------------------------------------------------------------|----------------------------------------------------------------------|-----------------------------------------------------------------------------------------------------------------------------------------------------------------------------------------------------|----------------------------------------------|--------------------------------------------------------------------|-----------------------------------------------------------------------------------------------------------------------------------------------------------------------------------------------------------------------------------------------------------------------------------------------------------------------------------------------------------------------------------------------------------------------------------------------------------------------------------------------------------------------------------------------------------------------------------------------------------------------------------------------------------------------------------------------|
| <b>2020</b> | Factors related to poor diet quality in food insecure populations                                       | Ranjit, N.; Macias, S.; Hoelscher, D                                 | To examine food procurement related behaviors and psychosocial attitudes in food insecure populations.                                                                                              | Quantitative – cross sectional               | (n = 1,171) adults                                                 | Food insecure populations were significantly more likely to use cost saving practices, such as comparing prices. Food insecure were less likely to cook/eat a home cooked meal compared with food secure. There was little difference in anticipatory behaviors between households such as meal planning, making a list. Food insecure households reported as less likely to read food labels. Preparation & consumption of home cooked meals has the largest impact on reducing food security gap with increased frequency of fruit and vegetable intake.                                                                                                                                    |
| <b>2016</b> | Family chaos and lack of mealtime planning is associated with food insecurity in low-income households  | Fiese, B. H.; Gundersen, C.; Koester, B.; Jones, B                   | Examine the role of chaos and mealtime planning in food insecure and food secure households                                                                                                         | Qualitative & quantitative – cross-sectional | Data from parents in the Food and Family Project during 2010-2011. | Food insecure households report more chaos than food secure. Family chaos is statistically significant and positively associated with food insecurity. Food insecure households reported less meal planning than food secure households.                                                                                                                                                                                                                                                                                                                                                                                                                                                      |
| <b>2019</b> | Food and financial coping strategies during the monthly Supplemental Nutrition Assistance Program cycle | Kinsey, E. W.; Oberle, M.; Dupuis, R.; Cannuscio, C. C.; Hillier, A. | To provide a critical exploration of the nature and timing of coping strategies for managing the SNAP cycle, including implications these coping mechanisms have for health and financial stability | Qualitative – cross sectional                | (n = 12) mothers receiving SNAP benefits                           | Strategies reported to manage SNAP included: <ul style="list-style-type: none"> <li>• Adjustments to shopping and eating patterns – adjusting what was being bought at each shopping trip. Stretching SNAP dollars by cooking meals at home, menu planning, making shopping list, buying sale items, couponing, shopping outlets based on sales/promotions.</li> <li>• Eating less/skipping meals when food running out to make sure children have enough.</li> <li>• Price and quantity are major determinants</li> <li>• Mental accounting and resilience – creating a food budget</li> <li>• Reliance on social network for support – instrumental, emotional and informational</li> </ul> |
| <b>2016</b> | Food insecurity, overweight and obesity among low-income African American families in                   | Vedovato, G. M.; Surkan, P. J.; Jones-                               | Investigate factors influencing food decisions                                                                                                                                                      | Quantitative-Cross-sectional                 | (n = 298) caregiver-                                               | Food secure households had higher level of agreement with healthy food as being affordable when compared with both                                                                                                                                                                                                                                                                                                                                                                                                                                                                                                                                                                            |

|                                                            |                                                                                   |                              |  |                           |                                                                                                                                                                                                                                                                                                                            |
|------------------------------------------------------------|-----------------------------------------------------------------------------------|------------------------------|--|---------------------------|----------------------------------------------------------------------------------------------------------------------------------------------------------------------------------------------------------------------------------------------------------------------------------------------------------------------------|
| Baltimore City: associations with food-related perceptions | Smith, J.; Steeves, E. A.; Han, E.; Trude, A. C.; Kharmats, A. Y.; Gittelsohn, J. | made by minority populations |  | child dyads (10-14yr/old) | food insecure groups and food insecure groups who experienced hunger. The food insecure group reported healthy food as being less accessible and less convenient to buy and prepare. Results did not find significant difference regarding food related behaviors and psychosocial factors across levels of food security. |
|------------------------------------------------------------|-----------------------------------------------------------------------------------|------------------------------|--|---------------------------|----------------------------------------------------------------------------------------------------------------------------------------------------------------------------------------------------------------------------------------------------------------------------------------------------------------------------|

|             |                                                                                                                        |                                                                  |                                                                                                                                                                                                                                                                                         |                                |                                                           |                                                                                                                                                                                                                                                                                                                                                   |
|-------------|------------------------------------------------------------------------------------------------------------------------|------------------------------------------------------------------|-----------------------------------------------------------------------------------------------------------------------------------------------------------------------------------------------------------------------------------------------------------------------------------------|--------------------------------|-----------------------------------------------------------|---------------------------------------------------------------------------------------------------------------------------------------------------------------------------------------------------------------------------------------------------------------------------------------------------------------------------------------------------|
| <b>2014</b> | Food preparation supplies predict children's family meal and home-prepared dinner consumption in low-income households | Appelhans, B. M.; Waring, M. E.; Schneider, K. L.; Pagoto, S. L. | Investigate the association of food preparation supplies availability in the home with family meal frequency and child consumption of home-prepared meals in low-income urban households. Evaluate the extent to which these factors are associated with potential confounding factors. | Quantitative - Cross sectional | (n = 103) Caregivers of 1 child aged between (6-13 years) | Higher food preparation supplies associated with more frequent family meals & intake of homemade meals by children. With increased family meals, there was increased consumption of fruit and vegetables, and reduced association with sugar sweetened beverages consumption. Financial strain was associated with reduced family meal frequency. |
|-------------|------------------------------------------------------------------------------------------------------------------------|------------------------------------------------------------------|-----------------------------------------------------------------------------------------------------------------------------------------------------------------------------------------------------------------------------------------------------------------------------------------|--------------------------------|-----------------------------------------------------------|---------------------------------------------------------------------------------------------------------------------------------------------------------------------------------------------------------------------------------------------------------------------------------------------------------------------------------------------------|

|             |                                                                                                                                     |                                                                                                        |                                                                                                                                                                                                                                                                           |                                |                                                    |                                                                                                                                                                                                                                                                                                                                                                                                                                                                                                                                                                                                                                                                                                                                                           |
|-------------|-------------------------------------------------------------------------------------------------------------------------------------|--------------------------------------------------------------------------------------------------------|---------------------------------------------------------------------------------------------------------------------------------------------------------------------------------------------------------------------------------------------------------------------------|--------------------------------|----------------------------------------------------|-----------------------------------------------------------------------------------------------------------------------------------------------------------------------------------------------------------------------------------------------------------------------------------------------------------------------------------------------------------------------------------------------------------------------------------------------------------------------------------------------------------------------------------------------------------------------------------------------------------------------------------------------------------------------------------------------------------------------------------------------------------|
| <b>2018</b> | Friends and Family: How African-American Adolescents' Perceptions of Dietary Beliefs and Behaviors of Others Relate to Diet Quality | Wroblewski, M. M.; Parker, E. A.; Hager, E.; Hurley, K. M.; Oberlander, S.; Merry, B. C.; Black, M. M. | Determine if perceived parental dietary beliefs, caregiver-reported parental monitoring of the adolescent diet, and perceived peer eating behaviors are related to African American adolescents 'diet quality and whether these factors vary by participants 'age and sex | Quantitative - cross sectional | (n = 216) caregiver-adolescent dyads (11-16 years) | Dietary quality scores among adolescents are positively associated with adolescents' perceptions of parents' beliefs regarding nutrition, healthy dietary choices among peers, caregivers report of parental monitoring of adolescent dietary behavior. Adolescents' dietary behaviors reflect their perceptions of the social environment. Perceived parental beliefs about nutrition were positively related to diet quality, and these findings are consistent with research that shows that parental attitudes about a healthy diet and modeling of desirable dietary behaviors are positively associated with adolescents increased fruit and vegetable consumption and with eating more healthful food & negative association with SSB consumption. |
|-------------|-------------------------------------------------------------------------------------------------------------------------------------|--------------------------------------------------------------------------------------------------------|---------------------------------------------------------------------------------------------------------------------------------------------------------------------------------------------------------------------------------------------------------------------------|--------------------------------|----------------------------------------------------|-----------------------------------------------------------------------------------------------------------------------------------------------------------------------------------------------------------------------------------------------------------------------------------------------------------------------------------------------------------------------------------------------------------------------------------------------------------------------------------------------------------------------------------------------------------------------------------------------------------------------------------------------------------------------------------------------------------------------------------------------------------|

|             |                                                                                                                        |                                                                                                               |                                                                                                                                                               |                                |                                                                  |                                                                                                                                                                                                                                                                                                                                                                                                                                                                                                                                                                                                                    |
|-------------|------------------------------------------------------------------------------------------------------------------------|---------------------------------------------------------------------------------------------------------------|---------------------------------------------------------------------------------------------------------------------------------------------------------------|--------------------------------|------------------------------------------------------------------|--------------------------------------------------------------------------------------------------------------------------------------------------------------------------------------------------------------------------------------------------------------------------------------------------------------------------------------------------------------------------------------------------------------------------------------------------------------------------------------------------------------------------------------------------------------------------------------------------------------------|
| <b>2020</b> | What a city eats: Examining the dietary preferences of families living in communities at high risk for food insecurity | Cummer, E.; Loyola Amador, C.; Montez, K.; Skelton, J. A.; Ramirez, B.; Best, S.; Zimmer, R.; Palakshappa, D. | Aim of understanding the dietary patterns, food preferences and meal preparation methods of families at high risk of food insecurity                          | Qualitative – cross sectional  | (n = 63) adults                                                  | Sample population showed food preferences with a high intake of calorie dense foods and low consumption of vegetables. Expressed little interest in learning new recipes or cooking method to assist with healthy eating                                                                                                                                                                                                                                                                                                                                                                                           |
| <b>2015</b> | Rural Latino caregivers' beliefs and behaviors around their children's salt consumption                                | Hoefl, K. S.; Guerra, C.; Gonzalez-Vargas, M. J.; Barker, J. C.                                               | Examine the knowledge, beliefs and behaviors of rural Latino caregivers regarding their children's salt consumption and related health implications           | Qualitative – cross sectional  | (n = 61) caregivers of children (elementary school ages or less) | Parents recognized sources of sodium and reported they used strategies to reduce their child's sodium intake for example limiting salt used in food preparation, limiting frequency of salty food consumption. However, overlooked other significant sources.                                                                                                                                                                                                                                                                                                                                                      |
| <b>2018</b> | Psychosocial Determinants of Food Acquisition and Preparation in Low-Income, Urban African American Households         | Henry, J. L.; Trude, A. C. B.; Surkan, P. J.; Anderson Steeves, E.; Hopkins, L. C.; Gittelsohn, J.            | Identify psychosocial factors influencing food purchasing and food preparation behaviors of adult caregivers in African American low-income urban communities | Quantitative - Cross Sectional | (n = 465) caregivers of children (10-14 years)                   | Higher food-related behavioral intention scores were marginally significantly associated with healthier food acquisition, healthier food preparation methods, and lower frequency of purchasing at prepared food sources. Greater food-related self-efficacy was positively associated with healthy food preparation methods and negatively associated with purchasing at prepared food sources. Higher nutrition knowledge was only associated with lower frequency of purchasing at prepared food sources. No association founds between nutritional knowledge and food preparation methods or food acquisition. |
| <b>2019</b> | Parenting styles are associated with overall child dietary quality within low-income and food-insecure households      | Burke, M. P.; Jones, S. J.; Frongillo, E. A.; Blake, C. E.; Fram, M. S.                                       | Examine the association between parenting styles and child dietary quality in low income and food insecure households                                         | Quantitative – cross sectional | (n = 171) parent-child dyads (9 - 15 years)                      | Authoritative and authoritarian parenting styles had a significant association such that as parents reported more authoritative parenting attitudes and behaviors, their children were predicted to have higher dietary quality if they also reported an average or greater authoritarian attitudes and behaviors. Permissive parenting attitudes and behaviors were negatively associated with child dietary quality.                                                                                                                                                                                             |

|      |                                                                                              |                                                                                                                                   |                                                                                                                                                                                                               |                                              |                                                                                           |                                                                                                                                                                                                                                                                                                                                                                                                     |
|------|----------------------------------------------------------------------------------------------|-----------------------------------------------------------------------------------------------------------------------------------|---------------------------------------------------------------------------------------------------------------------------------------------------------------------------------------------------------------|----------------------------------------------|-------------------------------------------------------------------------------------------|-----------------------------------------------------------------------------------------------------------------------------------------------------------------------------------------------------------------------------------------------------------------------------------------------------------------------------------------------------------------------------------------------------|
| 2016 | Low-income mothers' feeding goals predict observed home mealtime and child feeding practices | Pesch, M. H.; Miller, A. L.; Appugliese, D. P.; Kaciroti, N.; Rosenblum, K. L.; Lumeng, J. C.                                     | Investigate the assoc. of mothers feeding goals with observed home mealtime and feeding practices in a sample of US low-income mothers.                                                                       | Quantitative - longitudinal                  | (n = 265) female caregiver-child dyads (mean child aged 70.8 months)                      | Goal of restricting junk food associated with child always eating at the table, but not with mother restricting junk food. Goal of promoting fruit and vegetable associated with mother promoting veg. Results conclude that parental feeding goals may not turn into feeding practices.                                                                                                            |
| 2022 | Kitchen Adequacy and Child Diet Quality in a Racially/Ethnically Diverse Sample              | Fertig, A. R.; Trofholz, A. C.; Loth, K.; Tate, A. D.; Miner, M.; Neumark-Sztainer, D.; Westfall, E. C.; Westby, A.; Berge, J. M. | Investigate the kitchen adequacy of households with young children from low socioeconomic backgrounds Identify the risk and protective factors for childhood obesity in home environment in these households. | Quantitative & qualitative – cross sectional | (n =150) families with children (5 – 7 years)                                             | The majority of families had adequate kitchen facilities and supplies in their homes. The items most likely to be lacking included equipment for using the oven (baking pan and oven mitt), utensils for measuring (cups and spoons), and tools for preparing vegetables (cutting board, peeler, and grater) Results suggest that kitchen adequacy is not a major barrier to overall healthy eating |
| 2020 | Is healthy eating too expensive? How low-income parents evaluate the cost of food            | Daniel, C                                                                                                                         | Investigate how low-income consumers evaluate the cost of food                                                                                                                                                | Qualitative – cross sectional                | (n = 49) caregivers and (n = 37) grocery-shopping observations with (n =34) interviewees. | Findings report that participants judged the cost of food in 2 ways <ul style="list-style-type: none"> <li>• Absolute Judgment regarding if food would meet family needs and Consumption exceeds expectation</li> <li>• Relative Judgement which involves interpreting and comparing prices.</li> </ul>                                                                                             |



|      |                                                                                                                                                        |                                                                                                       |                                                                                                                                                                                                                                          |                               |                                              |                                                                                                                                                                                                                                                                                                                                                                                                                                                                                                                                                                                                                                                 |
|------|--------------------------------------------------------------------------------------------------------------------------------------------------------|-------------------------------------------------------------------------------------------------------|------------------------------------------------------------------------------------------------------------------------------------------------------------------------------------------------------------------------------------------|-------------------------------|----------------------------------------------|-------------------------------------------------------------------------------------------------------------------------------------------------------------------------------------------------------------------------------------------------------------------------------------------------------------------------------------------------------------------------------------------------------------------------------------------------------------------------------------------------------------------------------------------------------------------------------------------------------------------------------------------------|
| 2019 | "I try, I do": Child feeding practices of motivated, low-income parents reflect trade-offs between psychosocial- and nutrition-oriented goals          | Schuster, R. C.; Szpak, M.; Klein, E.; Sklar, K.; Dickin, K. L                                        | Understand parents' goals for feeding their children, underlying motivations for these goals, the strategies they employed to work toward them, and the contextual environment that challenged or facilitated achievement of these goals | Qualitative – cross sectional | (n = 21) caregiver of a child (3-11 years)   | Nutrition and health-oriented goals were reported by parents, which included encouraging child to eat nutritious diet, fostering healthful relationship with food, economising food costs, reducing parents own meal size/frequency and avoiding inadequate nutrient intake. Psychosocial-orientated goals included having family meals to enhance family relationships and helping child feel secure.                                                                                                                                                                                                                                          |
| 2017 | How parents describe picky eating and its impact on family meals: A qualitative analysis                                                               | Trofholz, A. C.; Schulte, A. K.; Berge, J. M                                                          | Examine parents' experiences and perspectives regarding picky eating in order to understand its impact on families, including during family meals                                                                                        | Qualitative – cross sectional | (n = 88) caregivers of children (2-18 years) | Picky eating was reported to be disruptive to family meal creating meal-related stress. Picky eating can lead to altering meal preparation or making separate meals. Strategies parents use in response to picky eating include making child try the food, making separate meal, using take it or leave it approach, or child makes separate meal.                                                                                                                                                                                                                                                                                              |
| 2016 | Household, psychosocial, and individual-level factors associated with fruit, vegetable, and fiber intake among low-income urban African American youth | Trude, A. C.; Kharmats, A. Y.; Hurley, K. M.; Anderson Steeves, E.; Talegawkar, S. A.; Gittelsohn, J. | Identify the multi-level factors influencing fruit and veg consumption in African American youth.                                                                                                                                        | Quantitative- Cross sectional | (n = 285) caregiver-youth dyads (10-14years) | Fruit, vegetable, and fiber intake were positively related to youth intentions and self-efficacy for eating healthy. An increase prevalence in youth purchasing for food at supermarkets was associated with an increase in vegetable serving and fiber intakes. No statistical significance was found between food preparation behaviors, and fruit, vegetable, and fiber intake. Youth with parents who purchase food at fast-food restaurants showed a 7 % decrease in odds for vegetable intake. Self-efficacy, health outcome expectations, intention and knowledge are important psychosocial factors that may influence eating behavior. |

|      |                                                                                                                            |                                                                                 |                                                                                                                                                                             |                                              |                                               |                                                                                                                                                                                                                                                                                                                                                                                                                                                                                                                                                                                                                                                                                                                                                                                   |
|------|----------------------------------------------------------------------------------------------------------------------------|---------------------------------------------------------------------------------|-----------------------------------------------------------------------------------------------------------------------------------------------------------------------------|----------------------------------------------|-----------------------------------------------|-----------------------------------------------------------------------------------------------------------------------------------------------------------------------------------------------------------------------------------------------------------------------------------------------------------------------------------------------------------------------------------------------------------------------------------------------------------------------------------------------------------------------------------------------------------------------------------------------------------------------------------------------------------------------------------------------------------------------------------------------------------------------------------|
| 2106 | Home food environment factors associated with the presence of fruit and vegetables at dinner: A direct observational study | Trofholz, A. C.; Tate, A. D.; Draxten, M. L.; Neumark-Sztainer, D.; Berge, J. M | Investigate what home food environment characteristics are associated with the presence of fruit and veg at family dinners.                                                 | Qualitative & quantitative - Cross sectional | (n = 120) families with children (6-12 years) | Home availability and accessibility of fruit and vegetables reported as being predictive of fruit and vegetable intake in children and adolescents. Significant association found between meal planning and the presence of fruit in the home. Purchasing barriers (i.e., the cost, quality and variety of fruit and vegetables available at participant's grocery store) were not found to be statistically related with the presence of any fruit and/or vegetables at dinner meals.                                                                                                                                                                                                                                                                                            |
| 2013 | Eat this, not that! Parental demographic correlates of food-related parenting practices                                    | Loth, K. A.; MacLehose, R. F.; Fulkerson, J. A.; Crow, S.; Neumark-Sztainer, D. | Investigate how food-related parenting practices, specifically restriction and pressure to eat among parents of adolescents differ across sociodemographic characteristics. | Qualitative – cross sectional                | (n =3,709) parents/guardians of adolescents   | Many parents reported that they exhibited some level of control over their adolescent regarding how much food to eat, as well as what types of foods the adolescent should avoid. 37.5% of parents in the lowest household income bracket reported agreeing that they kept some foods out of reach of their adolescent, as compared to 28.3% in the mid-high-income bracket and 24.7% of parents in the high-income bracket. A significant association was found between food restriction and income, with those earning less than \$50,000 a year having the highest level of restriction. Household income was also negatively associated with level of pressure-to-eat with parents earning more than \$50,000 per year reporting the lowest use of pressure-to-eat behaviors. |

**Table 2.** Themes identified in each source of evidence

| <b>TITLE</b>                                                                                                                                                     | <b>Parental Behaviors</b> | <b>Adolescent /Child Behaviors</b> | <b>Food Procurement Behaviors</b> | <b>Food Preparation Behaviors</b> | <b>Psychosocial factors</b> |
|------------------------------------------------------------------------------------------------------------------------------------------------------------------|---------------------------|------------------------------------|-----------------------------------|-----------------------------------|-----------------------------|
| Associations between parent and child physical activity and eating behaviours in a diverse sample: an ecological momentary assessment study                      | X                         |                                    |                                   |                                   |                             |
| Barriers and facilitators to healthy eating among low-income Latino adolescents                                                                                  | X                         | X                                  |                                   |                                   | X                           |
| Barriers to Preparing and Cooking Vegetables Are Associated with Decreased Home Availability of Vegetables in Low-Income Households                              |                           |                                    |                                   | X                                 |                             |
| Caregiver Feeding Practices as Predictors for Child Dietary Intake in Low-Income, Appalachian Communities                                                        | X                         |                                    |                                   | X                                 |                             |
| Characteristics of Youth Food Preparation in Low-Income, African American Homes: Associations with Healthy Eating Index Scores                                   |                           |                                    |                                   | X                                 |                             |
| Describing Independent Eating Occasions among Low-Income Adolescents                                                                                             | X                         | X                                  |                                   |                                   |                             |
| Determinants of fruit and vegetable intake in low-income children and adolescents                                                                                | X                         | X                                  |                                   |                                   |                             |
| Determinants of Sugar-Sweetened Beverage Consumption among Low-Income Children: Are There Differences by Race/Ethnicity, Age, and Sex?                           | X                         | X                                  |                                   |                                   |                             |
| Diet and physical activity changes among low-income families: perspectives of mothers and their children                                                         | X                         |                                    |                                   |                                   |                             |
| Disrupted Relationships, Chaos, and Altered Family Meals in Food-Insecure Households: Experiences of Caregivers and Children                                     |                           |                                    |                                   | X                                 | X                           |
| Eating breakfast together as a family: mealtime experiences and associations with dietary intake among adolescents in rural Minnesota, USA                       |                           |                                    |                                   | X                                 |                             |
| Eat this, not that! Parental demographic correlates of food-related parenting practices                                                                          | X                         |                                    |                                   |                                   |                             |
| Eating- and weight-related parenting of adolescents in the context of food insecurity                                                                            | X                         |                                    |                                   |                                   |                             |
| Examining Factors Related to the Food Insecurity-Obesity Paradox in Low-Income Mothers and Fathers                                                               | X                         |                                    |                                   |                                   |                             |
| Family chaos and lack of mealtime planning is associated with food insecurity in low income households                                                           |                           |                                    | X                                 |                                   | X                           |
| Family function and eating behaviours among Hispanic/Latino youth: results from the Hispanic Community Children's Health Study/Study of Latino Youth (SOL Youth) | X                         |                                    |                                   |                                   |                             |
| Food and financial coping strategies during the monthly Supplemental Nutrition Assistance Program cycle                                                          | X                         |                                    | X                                 |                                   | X                           |

|                                                                                                                                                               |   |   |   |   |   |
|---------------------------------------------------------------------------------------------------------------------------------------------------------------|---|---|---|---|---|
| Food insecurity, overweight and obesity among low-income African-American families in Baltimore City: associations with food-related perceptions              |   |   |   |   | X |
| Food Parenting Practices That Influence Early Adolescents' Food Choices During Independent Eating Occasions                                                   | X |   |   |   |   |
| Food parenting practices in rural poverty context                                                                                                             | X |   |   |   |   |
| Food preparation supplies predict children's family meal and home-prepared dinner consumption in low-income households                                        |   |   | X | X |   |
| Friends and Family: How African-American Adolescents' Perceptions of Dietary Beliefs and Behaviors of Others Relate to Diet Quality                           | X |   |   |   |   |
| Home food environment factors associated with the presence of fruit and vegetables at dinner: A direct observational study                                    |   |   | X | X |   |
| Household, psychosocial, and individual-level factors associated with fruit, vegetable, and fiber intake among low-income urban African American youth        |   | X |   |   | x |
| How parents describe picky eating and its impact on family meals: A qualitative analysis                                                                      |   | X |   |   |   |
| "I try, I do": Child feeding practices of motivated, low-income parents reflect trade-offs between psychosocial- and nutrition-oriented goals                 | X |   |   |   | X |
| Factors related to poor diet quality in food insecure populations                                                                                             |   |   | X | X |   |
| Is healthy eating too expensive?: How low-income parents evaluate the cost of food                                                                            |   |   | X |   |   |
| Kitchen Adequacy and Child Diet Quality in a Racially/Ethnically Diverse Sample                                                                               |   |   |   | X |   |
| Low-income mothers' feeding goals predict observed home mealtime and child feeding practices                                                                  | X |   |   |   |   |
| Parenting styles are associated with overall child dietary quality within low-income and food-insecure households                                             | X |   |   |   |   |
| Parents as Role Models: Associations Between Parent and Young Children's Weight, Dietary Intake, and Physical Activity in a Minority Sample                   | X |   |   |   |   |
| Perceived Produce Availability and Child Fruit and Vegetable Intake: The Healthy Communities Study                                                            |   |   | X |   |   |
| Psychosocial Determinants of Food Acquisition and Preparation in Low-Income, Urban African American Households                                                |   |   | X |   | X |
| Putting Knowledge into Practice: Low-Income Women Talk about Food Choice Decisions                                                                            | X |   | X | X | X |
| Qualitative Evaluation of Drivers of Eating Decisions among SNAP Participants in Mississippi                                                                  | X |   | X |   |   |
| A qualitative investigation of how mothers from low income households perceive their role during family meals                                                 | X |   |   |   |   |
| A Qualitative Investigation of Parents' Perspectives About Feeding Practices With Siblings Among Racially/Ethnically and Socioeconomically Diverse Households | X | X |   |   |   |
| Rural Latino caregivers' beliefs and behaviors around their children's salt consumption                                                                       |   |   |   |   | X |
| Stretching Food and Being Creative: Caregiver Responses to Child Food Insecurity                                                                              | X |   | X | X |   |

|                                                                                                                                                          |   |   |   |
|----------------------------------------------------------------------------------------------------------------------------------------------------------|---|---|---|
| Understanding the Process of Prioritizing Fruit and Vegetable Purchases in Families with Low Incomes: "A Peach May Not Fill You Up as Much as Hamburger" | X |   |   |
| What a city eats: Examining the dietary preferences of families living in communities at high risk for food insecurity                                   |   | X | X |
| What's Being Served for Dinner? An Exploratory Investigation of the Associations between the Healthfulness of Family Meals and Child Dietary Intake      | X |   |   |
